# Supplementary material for: Radical-Friedel–Crafts benzylation of arenes over a metallic–basic bifunctional MoO 2 surface
Source: Royal Society of Chemistry journal article supplement (doi:10.1039/d5dt00631g), 2025-01-01
Supplement: d5dt00631g1.pdf [file d5dt00631g1.pdf]

## Supporting Information

### Radical-Friedel-Crafts Benzylation of Arenes over the Metallic-Basic Bifunctional MoO<sub>2</sub> Surface

Zhuo Li,<sup>a</sup> KaiYi Su,<sup>b</sup> Ting Li,<sup>a</sup> Jinlan Cheng,<sup>a</sup> Bo Jiang,<sup>a</sup> Tingwei Zhang,<sup>a</sup> and Chaofeng Zhang<sup>a\*</sup>

<sup>a</sup> College of Light Industry and Food Engineering, Nanjing Forestry University, Nanjing 210037, China

<sup>b</sup> Key Laboratory of Photochemical Conversion and Optoelectronic Materials, Technical Institute of Physics and Chemistry, Chinese Academy of Sciences, Beijing 100190, China

**Corresponding Authors:** zhangchaofeng@njfu.edu.cn

## Contents

|     |                                                                   |     |
|-----|-------------------------------------------------------------------|-----|
| 1.  | The crystal structure of the Mo-based catalysts                   | S3  |
| 2.  | TEM image of the as-synthesized MoO <sub>2</sub>                  | S3  |
| 3.  | The CO <sub>2</sub> -TPD characterization of MoO <sub>2</sub>     | S3  |
| 4.  | The BET characterization of MoO <sub>2</sub>                      | S4  |
| 5.  | Catalyst screen for the catalytic benzylation of the PX with DBE  | S5  |
| 6.  | Optimization of reaction conditions                               | S6  |
| 7.  | Hot-filtration test                                               | S8  |
| 8.  | Reuse test of MoO <sub>2</sub> and XRD characterization           | S9  |
| 9.  | The benzylation reactions between styrene and DBE                 | S11 |
| 10. | Hammett study                                                     | S12 |
| 11. | EPR measurements for the intermediate of the benzylation reaction | S13 |
| 12. | Radical trap experiment with TEMP                                 | S14 |
| 13. | Self-decomposition of DBE in dodecane                             | S15 |
| 14. | Benzylation of the PX with benzyl alcohol on MoO <sub>2</sub>     | S16 |
| 15. | Benzylation of PX with benzyl ethers in the presence of TEMPO     | S17 |
| 16. | PPh <sub>3</sub> trapping experiment                              | S18 |
| 17. | DFT calculations                                                  | S19 |
| 18. | Substrate Expansion                                               | S24 |
| 19. | Gram-scale reaction experiment                                    | S25 |
| 20. | Comparison of recently studied benzylation reaction systems       | S26 |
| 21. | NMR Spectra of some products                                      | S28 |
| 22. | Mass spectra data of the products                                 | S42 |
|     | <b>References</b>                                                 | S45 |

## 1. The crystal structure of the Mo-based catalysts

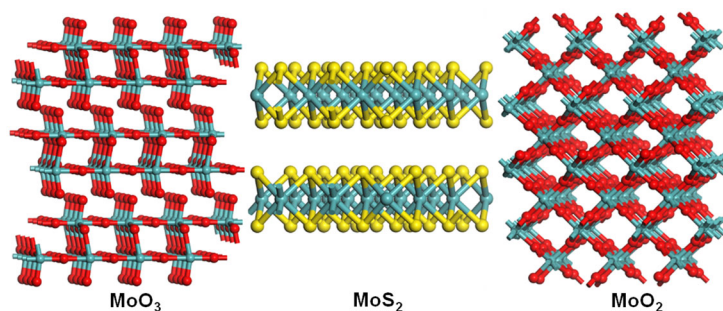

Figure S1. The crystal structure of the Mo-based catalyst

## 2. TEM images of the as-synthesized $\text{MoO}_2$

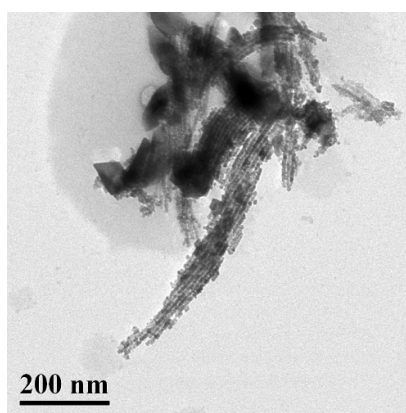

Figure S2. The TEM images of the as-synthesized  $\text{MoO}_2$

## 3. The $\text{CO}_2$ -TPD characterization of $\text{MoO}_2$

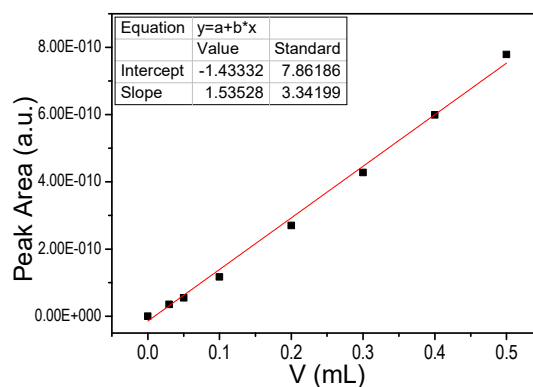

Figure S3. The standard working curve of  $\text{CO}_2$  for  $\text{CO}_2$ -TPD characterization

**Characterization procedure:**  $\text{MoO}_2$  NPs were treated by the  $\text{H}_2$  (10 v% in Ar) reduction at 450 °C for 0.5 h, then the cooled  $\text{MoO}_2$  NPs were then exposed to the  $\text{CO}_2$  atmosphere for 0.5 h at room temperature, with MS line  $m/z=44$  as the typical signal of  $\text{CO}_2$  and referring to the standard working curve of  $\text{CO}_2$ .

#### 4. The BET characterization of MoO<sub>2</sub> catalysts

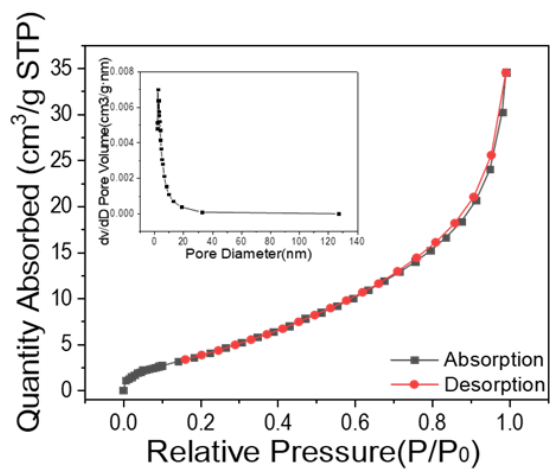

**Figure S4.** BET data analysis of commercial MoO<sub>2</sub>

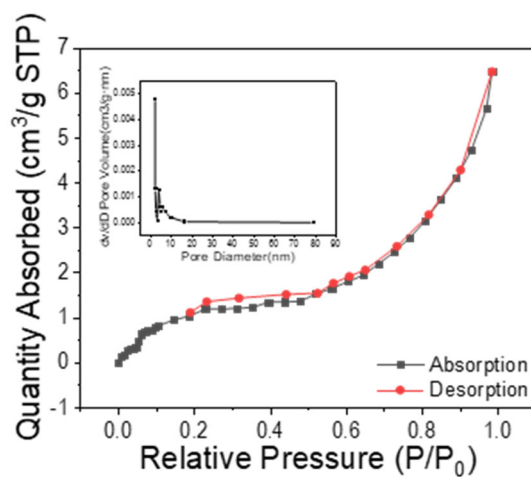

**Figure S5.** BET data analysis of MoO<sub>2</sub> synthesized by the template method

## 5. Catalyst screen for the catalytic benzylation of the PX with DBE

**Table S1.** Catalytic Benzylation of the PX with DBE over various catalysts<sup>a</sup>

c1ccc(cc1)COC(c2ccccc2)c3ccccc3 + c1ccc(cc1)C  $\xrightarrow{\text{Cat.}}$  c1ccc(cc1)Cc2ccc(Cc3ccccc3)cc2 + c1ccccc1C=O

**1a**                      **2a**                      **3a**                      **4a**

| Entry | Catalyst                           | 1a<br>Conv.(%) | Yield (%) |      | Entry           | Catalyst                       | 1a<br>Conv.(%) | Yield (%) |      |
|-------|------------------------------------|----------------|-----------|------|-----------------|--------------------------------|----------------|-----------|------|
|       |                                    |                | 3a        | 4a   |                 |                                |                | 3a        | 4a   |
| 1     | MoO <sub>2</sub>                   | 78.9           | 77.7      | 0.2  | 11              | Fe <sub>2</sub> O <sub>3</sub> | 0.5            | <0.1      | 0.3  |
| 2     | MoO <sub>3</sub>                   | 2.3            | 0.4       | 1.5  |                 | CuO                            | 2.3            | <0.1      | 1.5  |
| 3     | MoO <sub>x</sub> -150 <sup>b</sup> | 74.3           | 74.2      | <0.1 |                 | Cu <sub>2</sub> O              | 2.8            | <0.1      | 1.1  |
| 4     | MoO <sub>x</sub> -520 <sup>c</sup> | 2.4            | 2.0       | 0.1  |                 | PbO                            | 0.7            | <0.1      | 0.3  |
| 5     | MoO <sub>2</sub> <sup>d</sup>      | 66.7           | 66.2      | 0.3  |                 | PrO <sub>2</sub>               | 1.5            | <0.1      | 1.4  |
| 6     | MoO <sub>2</sub> <sup>e</sup>      | 67.5           | 67.1      | 0.2  |                 | CdO                            | 2.5            | <0.1      | 1.5  |
|       |                                    |                |           |      |                 | Ta <sub>2</sub> O <sub>5</sub> | 1.7            | <0.1      | 1.3  |
| 7     | Al <sub>2</sub> O <sub>3</sub>     | 2.1            | <0.1      | 1.2  | 12 <sup>f</sup> | FeCl <sub>3</sub>              | 69.1           | 69.0      | <0.1 |
|       | SiO <sub>2</sub>                   | 2.1            | <0.1      | 1.8  |                 | AlCl <sub>3</sub>              | 65.0           | 64.6      | <0.1 |
|       | Ga <sub>2</sub> O <sub>3</sub>     | 2.7            | <0.1      | 1.4  |                 | SnCl <sub>4</sub>              | 9.4            | 9.2       | <0.1 |
|       | GeO <sub>2</sub>                   | 2.8            | <0.1      | 1.4  |                 | NbCl <sub>5</sub>              | 70.2           | 70.0      | <0.1 |
|       | ZrO <sub>2</sub>                   | 1.5            | 0.1       | 1.4  |                 | MoCl <sub>5</sub>              | 89.1           | 87.7      | <0.1 |
|       | Nb <sub>2</sub> O <sub>5</sub>     | 1.7            | <0.1      | 1.4  |                 |                                |                |           |      |
|       | HfO <sub>2</sub>                   | 60.8           | 59.8      | 1.0  | 13              | TsOH                           | >99            | >99       | <0.1 |
| 8     | TiO <sub>2</sub> -A                | 1.6            | 0.1       | 1.6  | 14              | TS-1                           | 1.3            | <0.1      | 1.3  |
|       | TiO <sub>2</sub> -R                | 1.5            | <0.1      | 1.4  |                 | H-ZSM-5                        | 10.9           | 9.1       | 1.3  |
|       | V <sub>2</sub> O <sub>5</sub>      | 11.3           | 7.8       | 1.7  |                 | H-Beta                         | 1.3            | <0.1      | 1.0  |
|       | SnO <sub>2</sub>                   | 2.1            | <0.1      | 1.3  |                 | SBA-15                         | <0.1           | <0.1      | <0.1 |
|       | Sb <sub>2</sub> O <sub>3</sub>     | 1.8            | <0.1      | 1.5  |                 | MCM-41                         | 40.2           | 40.1      | <0.1 |
|       | Sb <sub>2</sub> O <sub>5</sub>     | 1.8            | <0.1      | 1.4  | 15              | Ru/C                           | <0.1           | <0.1      | <0.1 |
|       | Ta <sub>2</sub> O <sub>5</sub>     | 1.7            | <0.1      | 1.3  |                 | Rh/C                           | 3.0            | 0.3       | 0.1  |
|       | WO <sub>3</sub>                    | 4.7            | 3.0       | 1.6  |                 | Pd/C                           | 1.2            | 0.1       | 0.6  |
|       |                                    |                |           |      | Pt/C            | 1.2                            | <0.1           | 0.6       |      |
| 9     | MgO                                | <0.1           | <0.1      | <0.1 | 16              | Pd/CeO <sub>2</sub>            | <0.1           | <0.1      | <0.1 |
|       | Sc <sub>2</sub> O <sub>3</sub>     | 1.3            | <0.1      | 1.1  |                 | Pd/MgO                         | <0.1           | <0.1      | <0.1 |
|       | Y <sub>2</sub> O <sub>3</sub>      | 2.0            | <0.1      | 1.4  |                 | Pd/ZnO                         | <0.1           | <0.1      | <0.1 |
|       | La <sub>2</sub> O <sub>3</sub>     | 1.7            | <0.1      | 1.2  |                 |                                |                |           |      |
|       | Eu <sub>2</sub> O <sub>3</sub>     | 1.3            | <0.1      | 1.0  |                 | 2H-MoS <sub>2</sub>            | 12.0           | 10.7      | 0.9  |
| 10    | Cr <sub>2</sub> O <sub>3</sub>     | 4.9            | <0.1      | 0.9  | 17              | MoC <sub>2</sub>               | 72.1           | 71.8      | 0.2  |
|       | MnO <sub>2</sub>                   | 1.3            | <0.1      | 0.6  |                 | MoP                            | <0.1           | <0.1      | <0.1 |
|       | Mn <sub>3</sub> O <sub>4</sub>     | 2.2            | <0.1      | 1.0  |                 | MoB                            | 9.8            | 9.6       | 0.2  |
|       | Co <sub>3</sub> O <sub>4</sub>     | 1.2            | 0.1       | 0.3  |                 | MoSi <sub>2</sub>              | 5.8            | 1.2       | 4.7  |
|       | NiO                                | 2.2            | <0.1      | 0.9  |                 | MoSe <sub>2</sub>              | 0.4            | 0.4       | <0.1 |
|       | ZnO                                | 2.0            | 0.1       | 1.2  |                 |                                |                |           |      |
|       | In <sub>2</sub> O <sub>3</sub>     | 1.9            | <0.1      | 0.8  | 18              | MoO <sub>2</sub> <sup>g</sup>  | 73.9           | 70.5      | <0.1 |
|       | CeO <sub>2</sub>                   | 1.7            | <0.1      | 1.4  | 19              | MoO <sub>2</sub> <sup>h</sup>  | <0.1           | <0.1      | <0.1 |
|       | Bi <sub>2</sub> O <sub>3</sub>     | 1.6            | <0.1      | 1.1  | 20              | MoO <sub>2</sub> <sup>i</sup>  | >99            | 99        | <0.1 |
|       | Cr <sub>2</sub> O <sub>3</sub>     | 4.9            | <0.1      | 0.9  |                 |                                |                |           |      |

(a) Reaction conditions: Catalyst 100 mg, dibenzyl ether (DBE) 0.1 mmol, PX 2.0 mL, Ar 1 atm, 140 °C, 10 min; symbol --- means no additive or no product; (b) the catalyst is 150 °C-oxidized MoO<sub>2</sub>; (c) the catalyst was MoO<sub>2</sub> treated in the air flow at 520 °C; (d) reaction atmosphere is O<sub>2</sub>; (e) reaction atmosphere is Air; (f) catalyst is 2 mol%; (g) Additive is BHT; (h) additive is TEMPO; (i) reaction time is 1 h.

## 6. Optimization of reaction conditions

### 6.1 The effect of reaction temperature

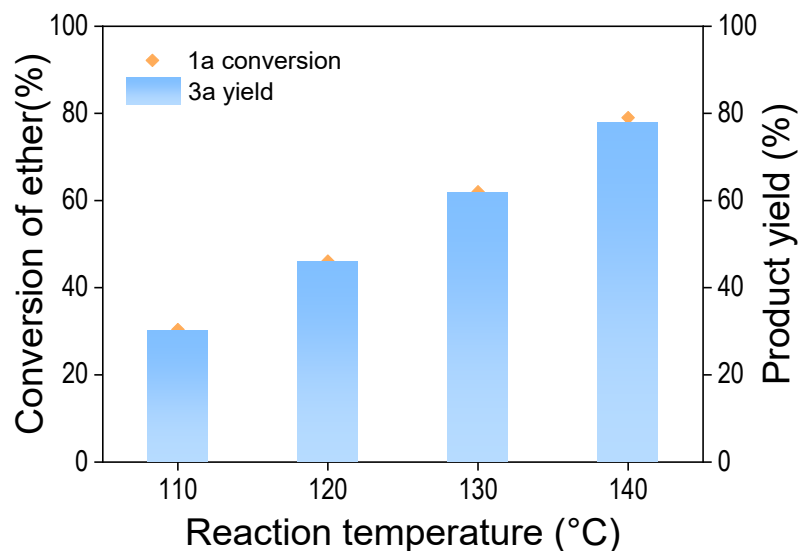

**Figure S6.** The effect of reaction temperature on **1a** conversion and **3a** yield. Reaction conditions: MoO<sub>2</sub> 100 mg, dibenzyl ether 0.1 mmol, PX 2.0 mL, 10 min, Ar 1 atm.

To calculate the apparent activation energy, the initial rate of the reaction was measured as a function of temperature (80, 90, 100, and 110 °C). In a typical reaction, in the glove box under the Ar atmosphere, dibenzyl ether (0.1 mmol) and MoO<sub>2</sub> (100 mg) were added in p-xylene (2.0 mL) in a 15 mL tube equipped with a Teflon stopcock. The reaction was stirred in an oil bath preset at a preset temperature for 10 min. Then, the tube was removed from the oil bath and immediately cooled in an ice-water bath. After the tube was open to the air, the dodecane (36.9 mg) as the standard substance was added to the reaction mixture. After the filtration with a Teflon filter membrane, the organic products are analyzed by GC-FID. The slope was used to calculate the apparent activation energy  $E_a=43.4 \text{ kJ}\cdot\text{mol}^{-1}$  according the Arrhenius Equation:

## 6.2 The effect of reaction time

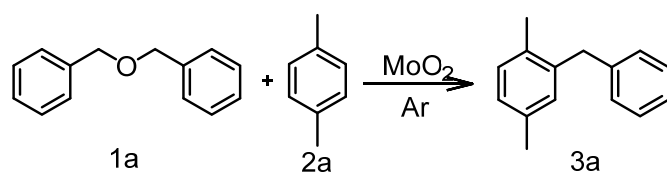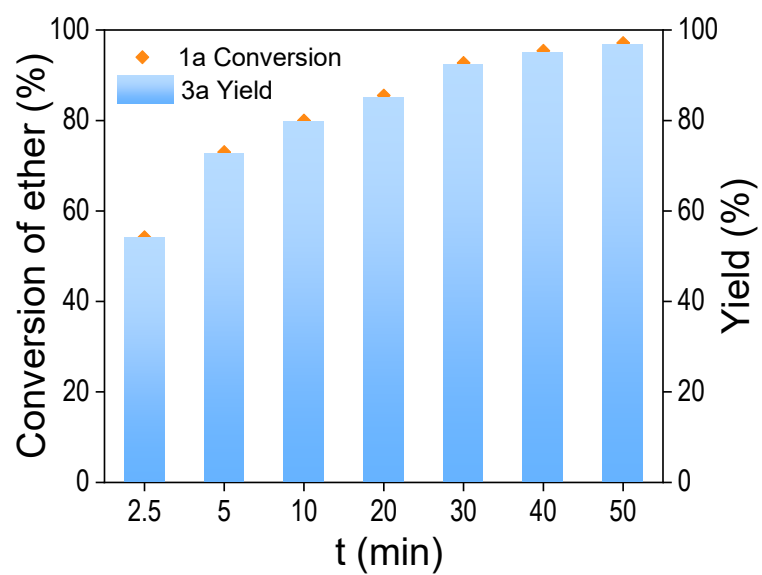

**Figure S7.** The effect of reaction time on **1a** conversion and **3a** yield. Reaction conditions:  $\text{MoO}_2$  100 mg, dibenzyl ether 0.1 mmol, PX 2.0 mL, 140 °C, Ar 1 atm.

## 7.Hot-filtration test

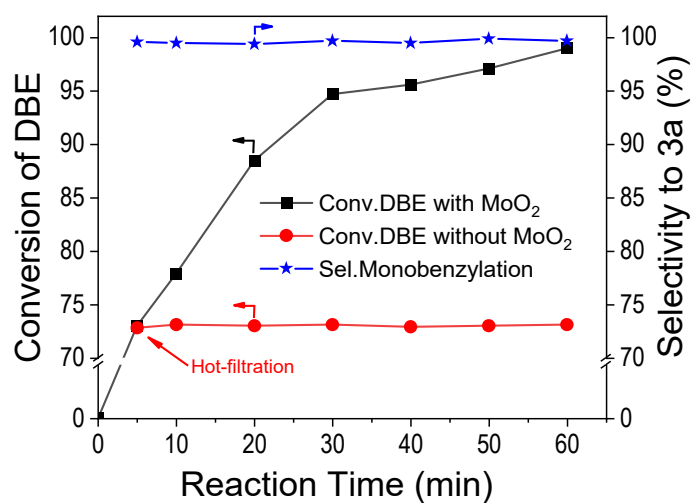

**Figure S8.** Benzylation of PX with DBE over MoO<sub>2</sub>. Reaction conditions: MoO<sub>2</sub> 100 mg, dibenzyl ether 0.1 mmol, PX 2.0 mL, 140 °C, Ar 1 atm.

To identify whether the MoO<sub>2</sub> catalyst is a heterogeneous catalyst, hot filtration testing was performed. When the reaction time is 5 minutes, the MoO<sub>2</sub> catalyst should be immediately filtered out of the catalytic reaction system while it is still hot. The reaction should then continue for 120 minutes under the same reaction conditions, and a small amount of the reaction mixture was taken at regular intervals during the reaction for quantitative analysis. The resulting experimental results are shown in Figure S8, no further reaction of the filtrate was detected after hot filtration, indicating that there was barely leached out of the active species and that MoO<sub>2</sub> catalyst did act as a heterogeneous catalyst.

## 8. Reuse test of MoO<sub>2</sub> and XRD characterization

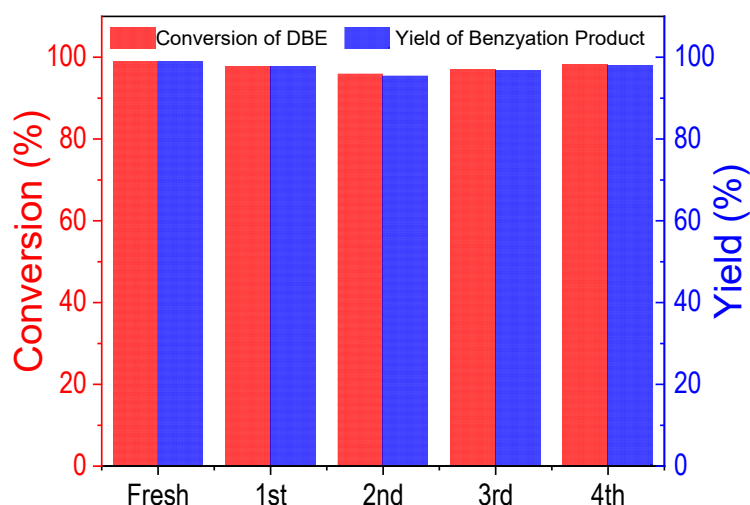

**Figure S9.** The reusability of MoO<sub>2</sub> in the benzylation of PX with DBE. Reaction conditions: MoO<sub>2</sub> 100 mg, DBE 0.1 mmol, PX 2.0 mL, Ar, 140 °C, 1 h. The recycled catalyst was reused without further fresh catalyst addition after separation from the previous reaction mixture and simple vacuum drying.

In the context of catalysts, the stability of their cycling reaction performance represents a crucial evaluation criterion for assessing their catalytic efficacy. In the case of heterogeneous MoO<sub>2</sub> catalysts, the separated MoO<sub>2</sub> could be recycled on four occasions without any change in activity following ethanol washing and vacuum drying. The results of the experiments are presented in **Figure S9**. After recycling, the MoO<sub>2</sub> catalysts demonstrated consistent catalytic performance, with only a slight decline in substrate conversion, and the selectivity of the benzylation products remained above 99%. The slight conversion decrease can be attributed to the sensitivity of the MoO<sub>2</sub> surface to the air after several times of exposure during the catalyst recycling and drying. The aforementioned experimental results demonstrate that the MoO<sub>2</sub> catalyst exhibits remarkable reusability.

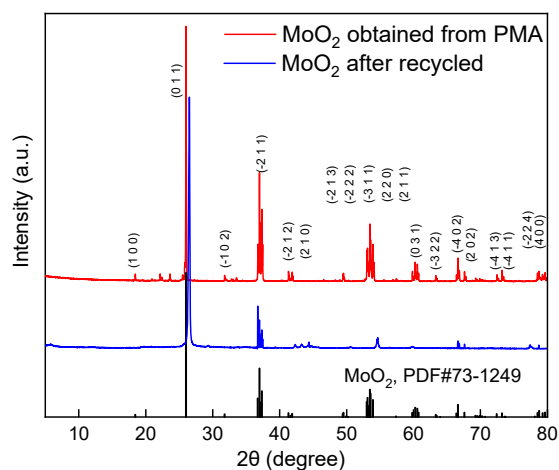

**Figure S10.** XRD characterization of catalysts before and after cyclic reactions.

Analysis of the XRD characterization results showed that there was no significant difference in the XRD patterns of molybdenum dioxide after four cyclic reactions. This indicates that the cyclic reaction process did not cause significant changes in the bulk structure or crystallinity of molybdenum dioxide, and the weakening of some peaks may be related to the slight oxidation of the catalyst.

## 9. The benzylation reactions between styrene and DBE

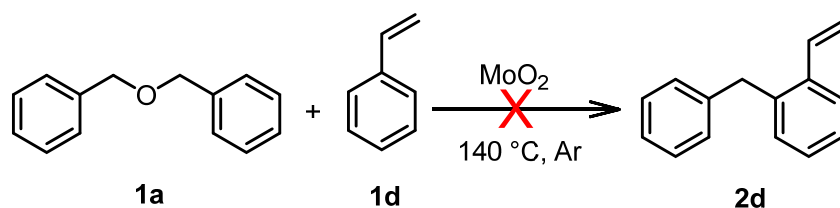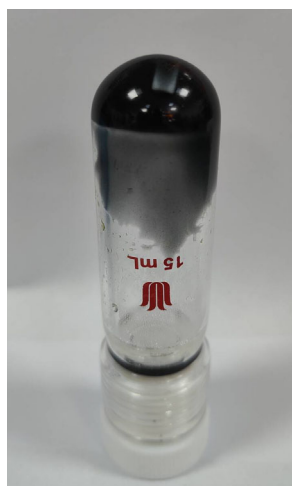

**Figure S11.** Polymerization of styrene and dibenzyl ether catalyzed by  $\text{MoO}_2$ . Reaction conditions:  $\text{MoO}_2$  100 mg, dibenzyl ether 0.1 mmol, dodecane 2.0 mL, 140 °C, Ar 1 atm.

The  $\text{MoO}_2$ -catalyzed benzylation between styrene and benzyl ether presented a distinctive phenomenon that deviates from the conventional reaction. As illustrated in **Figure S11**, the rapid polymerization of the reactants formed a solid colloid under the specified reaction conditions at 140 °C. It is postulated that the styrene molecule may be attacked by the radicals thermally decomposed from DBE, which can initiate the polymerization reaction of a high-viscosity solution or melt. The high viscosity colloid adheres to the inner wall of the reaction vessel and the rotor of the stirrer, thereby preventing further stirring.

## 10. Hammett study

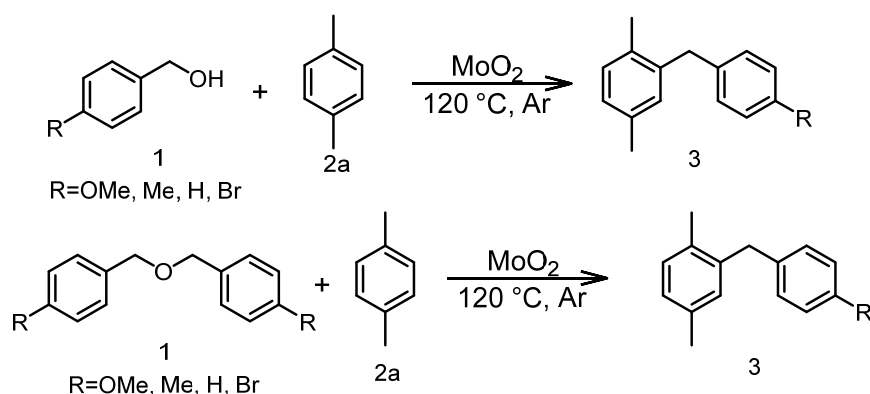

**Scheme S1.** Hammett study

In a glove box under the Ar atmosphere, para-substituted benzyl alcohols (1.0 mmol) or para-substituted dibenzyl ether (0.1 mmol), and MoO<sub>2</sub> (100 mg) were added in p-xylene (2.0 mL) in a 15 mL tube equipped with a Teflon stopcock. The reaction was stirred in an oil bath preset at 120 °C for 3 min (10 min for para-substituted dibenzyl ether). Then, the tube was taken out of the oil bath and immediately cooled in an ice-water bath. After the tube was opened to air, the Dodecane (0.01 mmol) as the standard substance was added into the reaction mixture. After the filtration with a Teflon filter membrane, the organic products are analyzed by NMR. The conversion was determined by NMR by measuring the appearance of the product.

## 11. EPR measurements of the intermediate of benzylation reaction

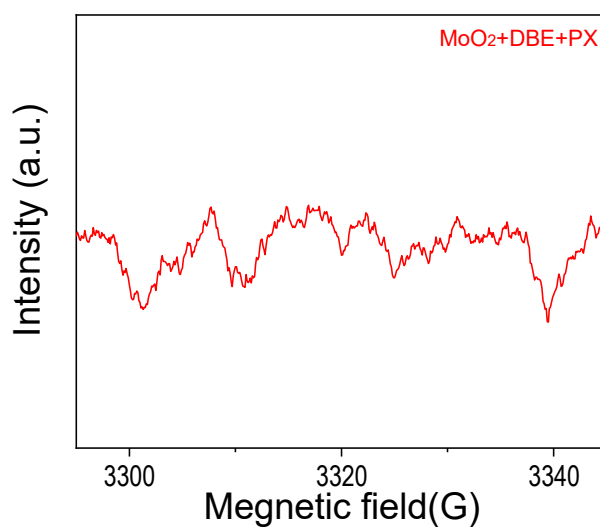

**Figure S12.** EPR measurements. Reaction conditions: MoO<sub>2</sub> 200 mg and DBE 0.5 mmol, PX 2.0 mL, 140 °C, Ar atmosphere. After 5 minutes of reaction, 0.25 mmol DMPO was injected into the system and the tube was immediately cooled down by liquid nitrogen. After the filtration with a Teflon filter membrane, the sample was transferred to a glass capillary and placed in a sealed glass tube under an Ar atmosphere for the EPR test.

## 12. Radical trap experiment with TEMP

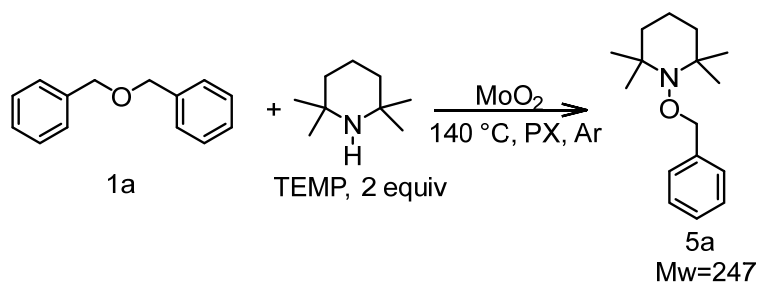

**Scheme S2.** Radical trap experiment with TEMP

In a glove box under the Ar atmosphere, dibenzyl ether (0.2 mmol), and MoO<sub>2</sub> (100 mg) were added in p-xylene (2.0 mL) in a 15 mL tube equipped with a Teflon stopcock. The reaction was stirred in an oil bath preset at 140 °C for 2 min. Then, 2,2,6,6-tetramethylpiperidine (TEMP, 1.0 mmol) was added under Argon atmosphere and the reaction was cooled down. After the filtration with a Teflon filter membrane, the organic products are analyzed by GC-MS (GC: Shimadzu 2030AM, MS: Shimadzu, QP2020NX). The mass spectrum of **5a** is shown in **Figure S13** with an  $m/z = 247$ .

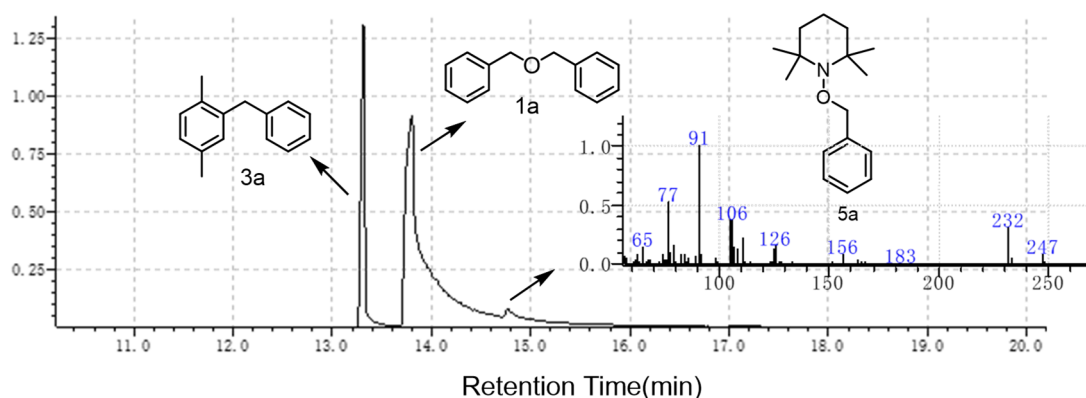

**Figure S13.** The GC-MS pattern of the radical trap experiment with TEMP

## 12. Self-decomposition of DBE in Dodecane

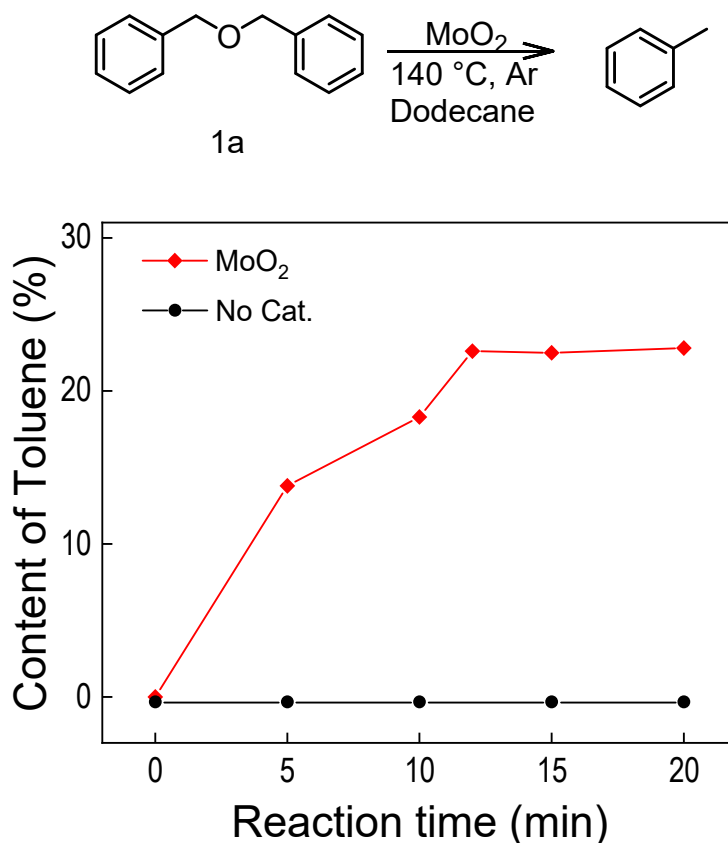

**Figure S14.** Content of toluene versus reaction time of self-decomposition of DBE in the absence or presence of MoO<sub>2</sub>. Reaction conditions: MoO<sub>2</sub> 100 mg, dibenzyl ether 0.1 mmol, dodecane 2.0 mL, 140 °C, Ar 1 atm.

The experiment procedure was similar to the previous typical reaction, in a 15.0 mL tube equipped with a Teflon stopper, dodecane (2.0 mL), dibenzyl ether (0.1 mmol), and catalyst (100 mg) were added. The sealed tube was stirred in an oil bath at 140 °C for a setting reaction time. As shown in **Figure S14**, the presence of MoO<sub>2</sub> resulted in a notable increase in toluene content compared to reactions without the catalyst. Moreover, an increase in toluene content was observed with longer reaction times, indicating that toluene was formed through the autolytic decomposition of dibenzyl ether in dodecane.

#### 14. Benzylation of the PX with benzyl alcohol on MoO<sub>2</sub>

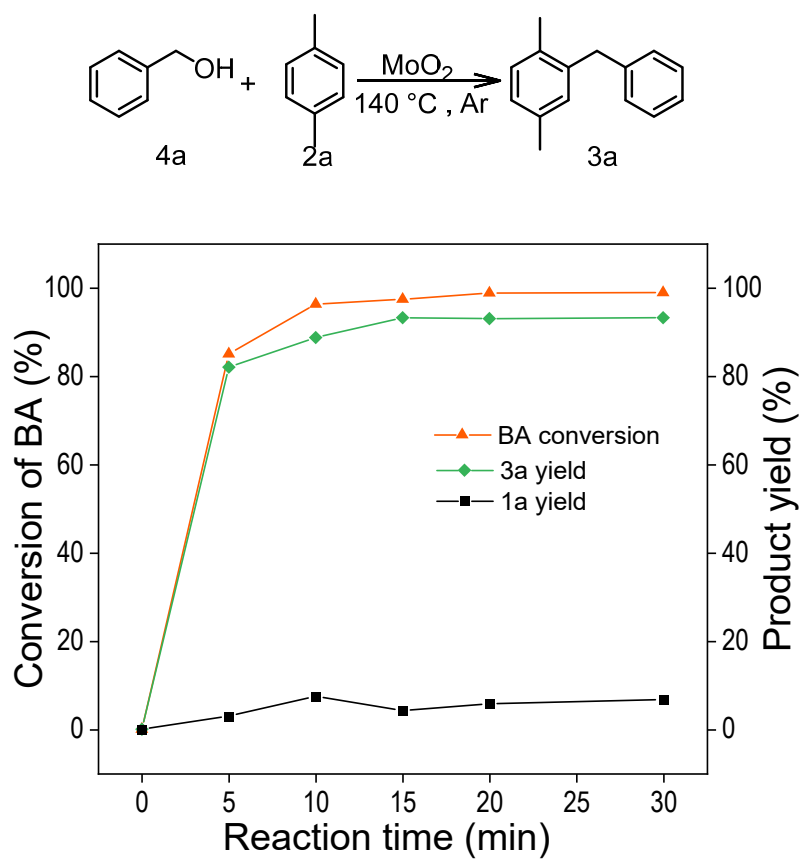

**Figure S15.** Time profile of benzylation of the PX with benzyl alcohol on MoO<sub>2</sub>. Reaction conditions: MoO<sub>2</sub> 50 mg, benzyl alcohol 0.1 mmol, PX 2.0 mL, 140 °C, Ar 1 atm.

## 14. Benzylation of PX with benzyl ethers in the presence of TEMPO

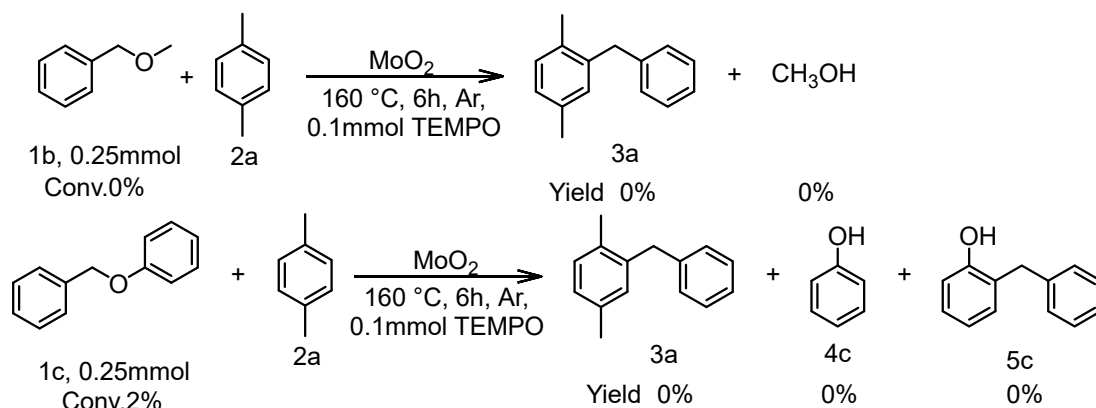

**Scheme S3.** Benzylation of PX with Benzyl Ethers in the Presence of TEMPO.

The benzylation of PX with of benzyl methyl ether (**1b**) and benzyl phenyl ether (**1c**) could significantly be restrained by TEMPO, which was consistent with the reaction using DBE as substrate. The result indicates that radicals still play a crucial role in the benzylation process with these benzyl ethers as the benzylation reagents.

## 16. PPh<sub>3</sub> trapping experiment

**Table S2:** PPh<sub>3</sub> trapping experiment

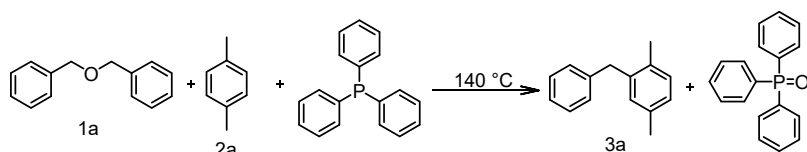

| Entry | Substrate | Catalyst         | Conv. Of 1a | Yield of 3a | Conv. Of PPh <sub>3</sub> | Yield of PPh <sub>3</sub> =O |
|-------|-----------|------------------|-------------|-------------|---------------------------|------------------------------|
| 1     | DBE       | MoO <sub>2</sub> | 6.3         | 6.3         | 78.5                      | 46.6                         |
| 2     | DBE       | -                | -           | -           | 0.2                       | 0.2                          |
| 3     | -         | MoO <sub>2</sub> | -           | -           | 78.2                      | 46.3                         |

Reaction conditions: DBE 0.1 mmol, PX 2 mL, catalyst 50 mg, 0.2 mmol of PPh<sub>3</sub>, 140 °C, 10 min, Ar atmosphere.

## 17. DFT calculations

We have employed the Vienna Ab Initio Simulation Package (VASP)<sup>1,2</sup> to perform all the density functional theory (DFT) calculations within the generalized gradient approximation (GGA) using the PBE<sup>3</sup> formulation. We have chosen the projected augmented wave (PAW) potentials<sup>4,5</sup> to describe the ionic cores and take valence electrons into account using a plane wave basis set with a kinetic energy cutoff of 450 eV. Partial occupancies of the Kohn–Sham orbitals were allowed using the Gaussian smearing method and a width of 0.05 eV. The on-site corrections (DFT+U) have been applied to the 4d electron of Mo atoms ( $U_{\text{eff}}=4.4$  eV) by the approach from Dudarev.<sup>6</sup> The electronic energy was considered self-consistent when the energy change was smaller than  $10^{-5}$  eV. A geometry optimization was considered convergent when the force change was smaller than 0.02 eV/Å. Grimme’s DFT-D3 methodology<sup>7</sup> was used to describe the dispersion interactions. The equilibrium lattice constants of the monoclinic MoO<sub>2</sub> unit cell were optimized to be  $a=5.633$  Å,  $b=4.912$  Å,  $c=5.508$  Å,  $\alpha=90^\circ$ ,  $\beta=120.1^\circ$ , and  $\gamma=90^\circ$ . We then use it to construct a MoO<sub>2</sub>(011) surface model with  $p(2\times 2)$  periodicity in the X and Y directions and two stoichiometric layers in the Z direction by vacuum depth of 15 Å in order to separate the surface slab from its periodic duplicates. This model comprises 32 Mo and 64 O atoms. During structural optimizations, a  $2\times 2\times 1$  k-point grid in the Brillouin zone was used for k-point sampling, and the bottom stoichiometric layer was fixed while the rest were allowed to fully relax.

The adsorption energy ( $E_{\text{ads}}$ ) of adsorbate A was defined as

$$E_{\text{ads}} = E_{\text{A/surf}} - E_{\text{surf}} - E_{\text{A(g)}}$$

where  $E_{\text{A/surf}}$ ,  $E_{\text{surf}}$  and  $E_{\text{A(g)}}$  are the energy of adsorbate A adsorbed on the surface, the energy of clean surface, and the energy of isolated A molecule in a cubic periodic box with a side length of 20 Å, respectively.

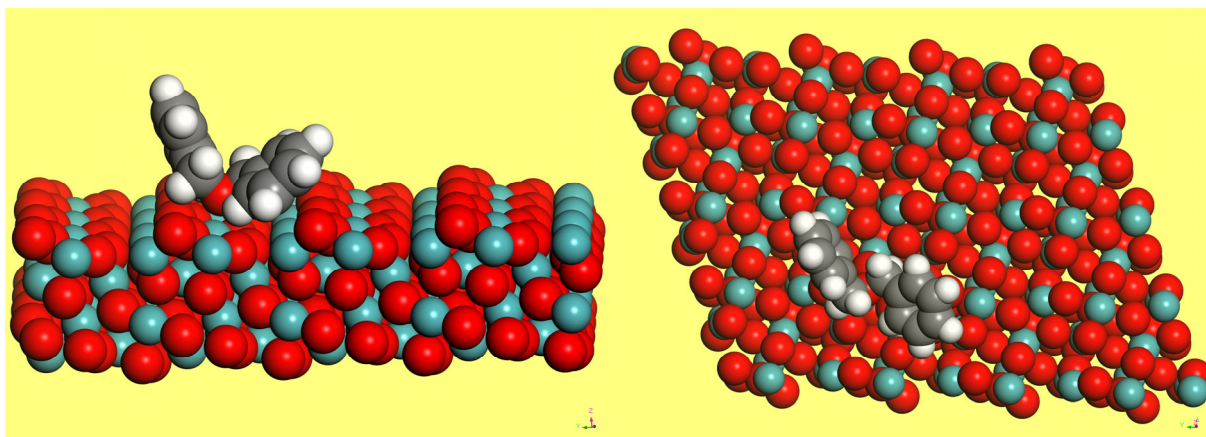

**A\* (Side View, BnOBn\*)**

**A\* (Top View, BnOBn\*)**

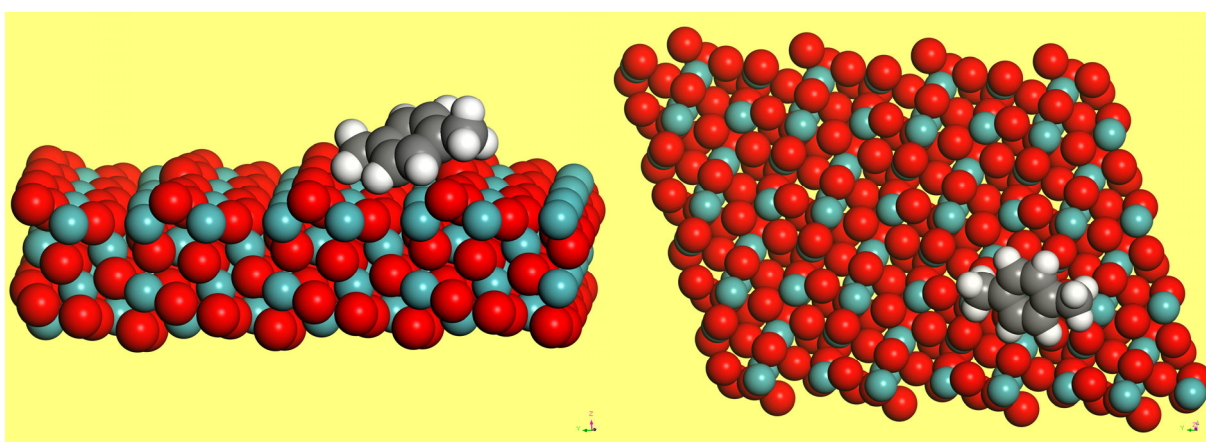

**B\* (Side View, PX\*)**

**B\* (Top View, PX\*)**

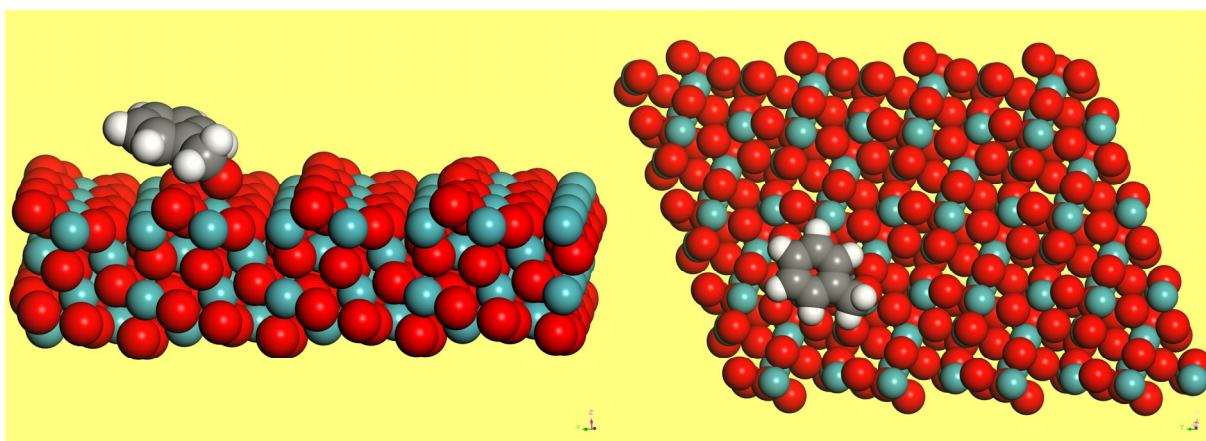

**C\* (Side View, BnO•\*)**

**C\* (Top View, BnO•\*)**

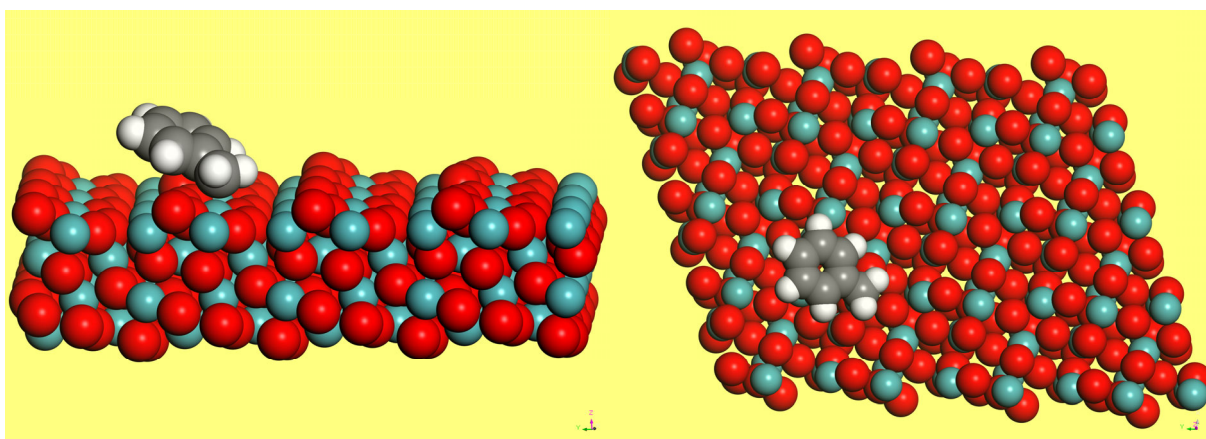

**D\* (Side View, Bn•\*)**

**D\* (Top View, Bn•\*)**

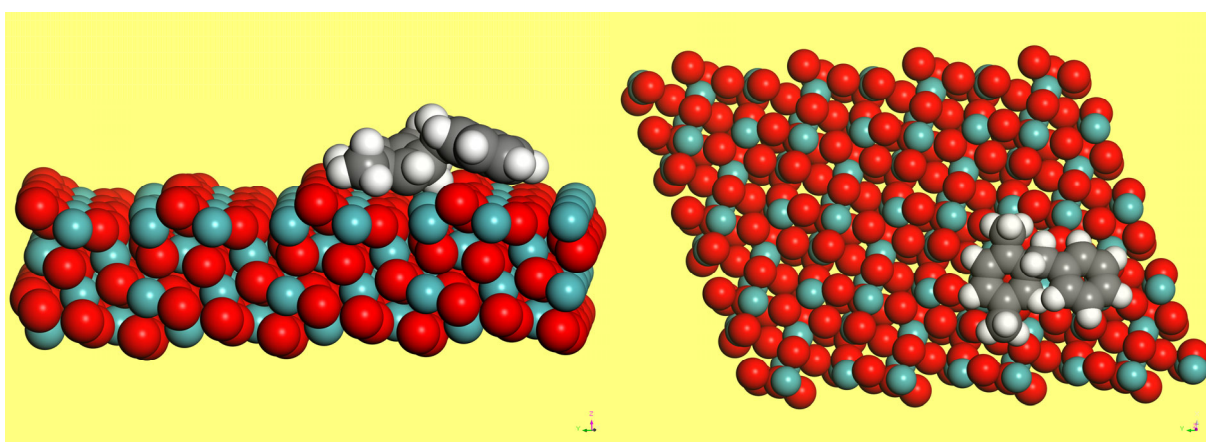

**E\* (Side View)**

**E\* (Top View)**

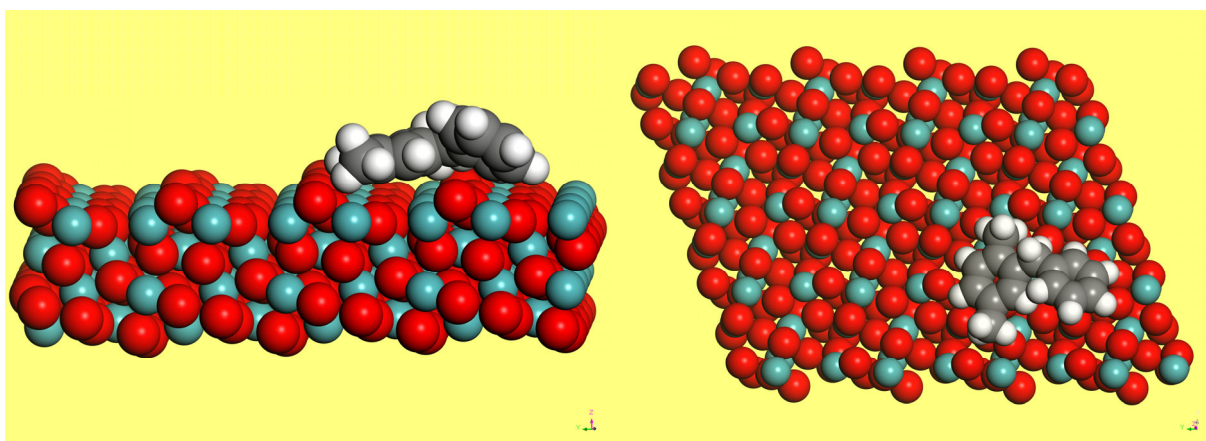

**F\* (Side View)**

**F\* (Top View)**

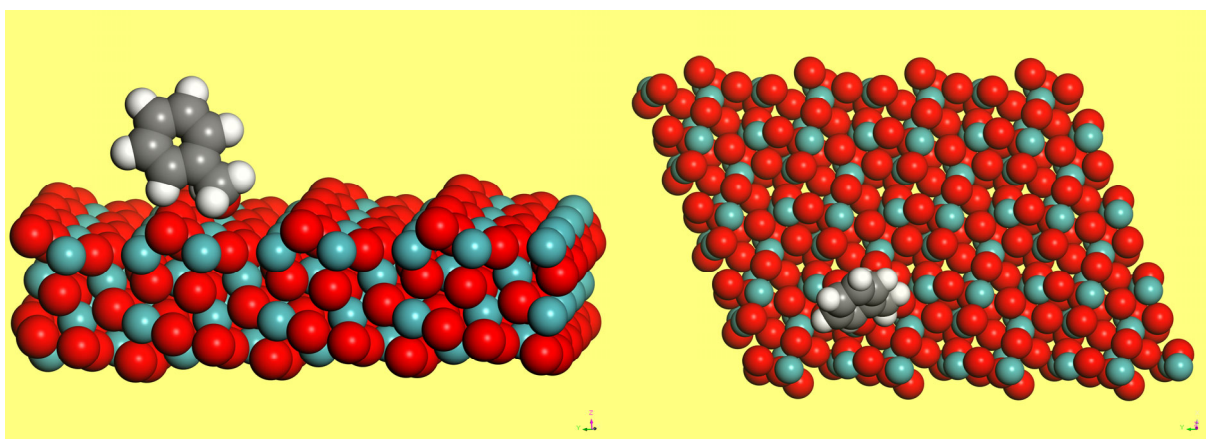

**G\* (Side View, BnOH\*)**

**G\* (Top View, BnOH\*)**

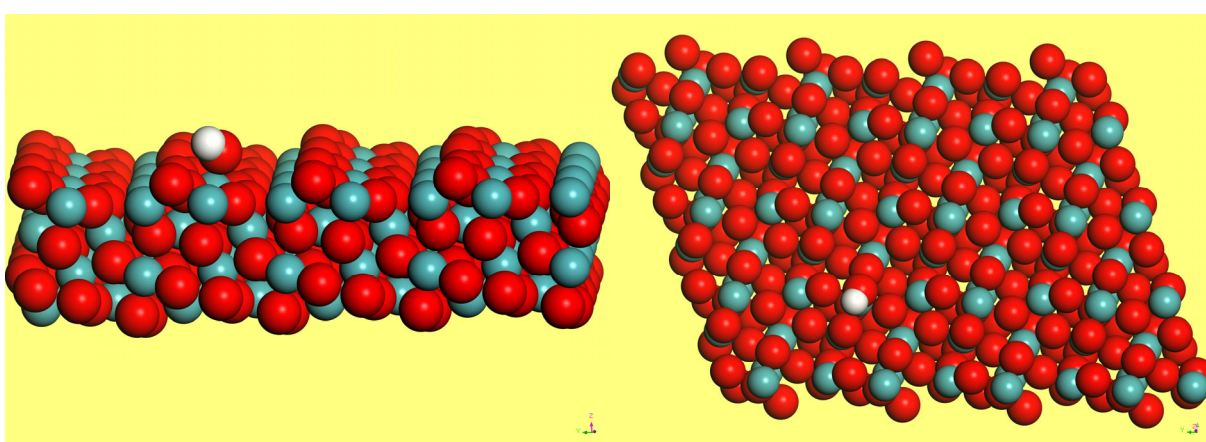

**H\* (Side View, HO\*)**

**H\* (Top View, HO\*)**

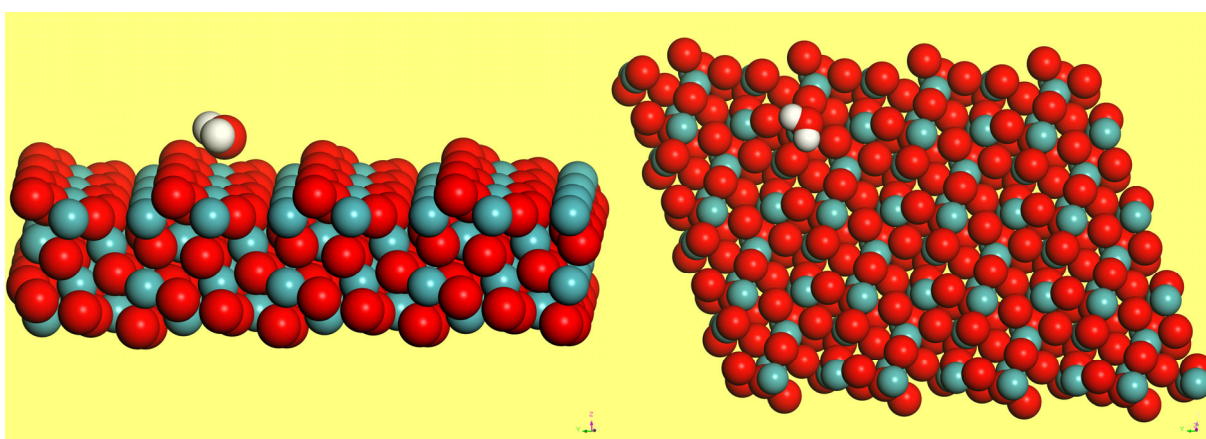

**I\* (Side View, H<sub>2</sub>O\*)**

**I\* (Top View, H<sub>2</sub>O\*)**

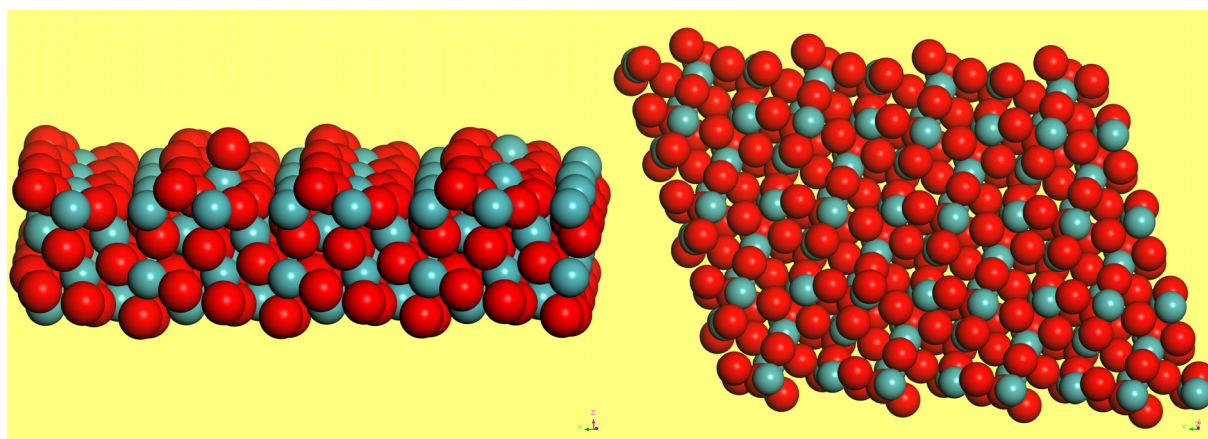

**J\* (Side View, O\*)**

**J\* (Top View, O\*)**

**Figure S16.** The molecular adsorption states of various intermediates

## 18. Substrate Expansion

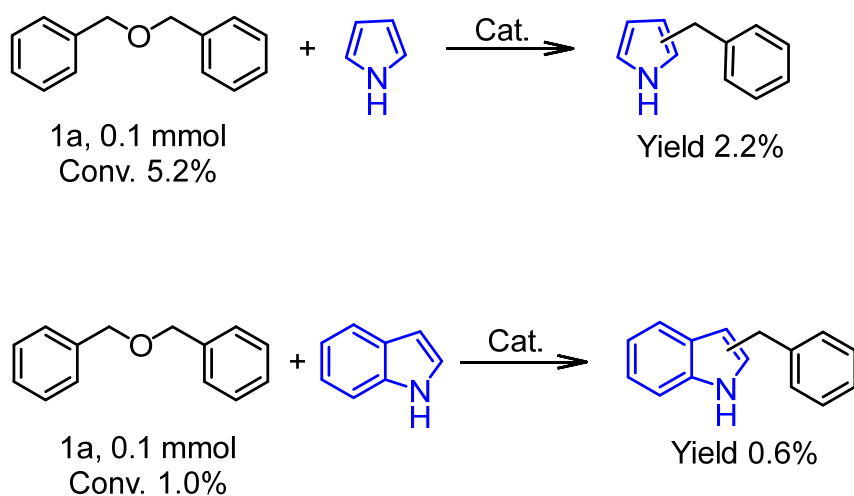

**Scheme S4.** Benzylation of N-heterocyclic compounds.

We also examined the effects of benzylation on electron-rich N-containing heterocyclic compounds, such as pyrrole and indole, under the following reaction conditions: DBE (0.1 mmol), MoO<sub>2</sub> (50 mg), and arene solvent (2 mL) were heated to 140 °C in a 15 mL pressure-resistant flask on an oil bath with stirring for a certain time. The above electron-rich N-containing heterocyclic compounds exhibit poor activity as shown in **Scheme S4**.

## 19. Gram-scale reaction experiment

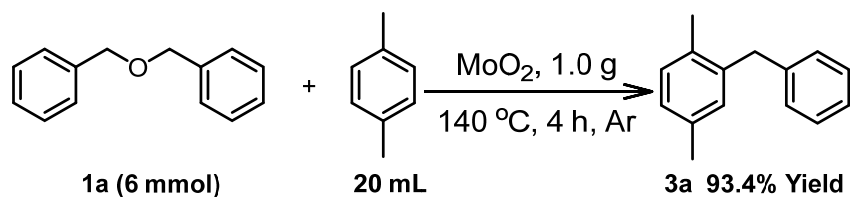

The optimal reaction conditions for this system were applied to the scale-up reaction. DBE (6 mmol), MoO<sub>2</sub> (1.0 g), and PX (20 mL) were heated to 140 °C in a 150 mL pressure-resistant flask on an oil bath with stirring for a certain time. After the reaction was completed, the reaction solution was cooled to room temperature and filtered to remove the catalyst. The organic phase was analyzed by GC/MS using n-dodecane as an internal standard. The substrate **1a** was completely converted within 4 h, providing a 93.4% yield of 2-benzyl-1,4-dimethylbenzene (**3a**).

## 20. Comparison of recently studied benzylation reaction systems

**Table S3.** Recent advances in the benzylation reaction systems

| Entry | Substrate                | Benzylation Reagent   | Catalyst                                                                                                      | Solvent                         | Conditions                                                                                             | Conv./Yield (benzylation) | Ref. |
|-------|--------------------------|-----------------------|---------------------------------------------------------------------------------------------------------------|---------------------------------|--------------------------------------------------------------------------------------------------------|---------------------------|------|
| 1     | Anisole                  | Benzyl alcohol        | H <sub>2</sub> [MIMPS]PW <sub>12</sub> O <sub>40</sub>                                                        | ---                             | 155 °C, 2 h                                                                                            | 99%/98%                   | 8    |
| 2     | p-xylene                 | Benzyl alcohol        | [SO <sub>3</sub> H-PMIm][OTf]                                                                                 | ---                             | 120 °C, 12 h                                                                                           | 99%/96%                   | 9    |
| 3     | toluene                  | benzyl alcohol        | BF <sub>3</sub> -H <sub>2</sub> O                                                                             | toluene                         | Benzylic alcohol (1.0 mmol), toluene (2.0 mL), BF <sub>3</sub> -OEt <sub>2</sub> 2 equiv., 80 °C, 2 h. | ---/96%                   | 10   |
| 4     | p-xylene                 | Benzyl fluoride       | HF                                                                                                            | HFIP/DCE (1:9)                  | r.t., 18 h                                                                                             | 95%/90%                   | 11   |
| 5     | p-xylene                 | Benzyl bromide        | InCl <sub>3</sub>                                                                                             | CH <sub>2</sub> Cl <sub>2</sub> | r.t., 16 h                                                                                             | 99%/99%                   | 12   |
| 6     | o-xylene                 | 4-chlorostyrene       | 3FeCl <sub>3</sub> 6H <sub>2</sub> O/Gly                                                                      | DES                             | 120 °C, 7 h                                                                                            | 99%/93%                   | 13   |
| 7     | p-xylene                 | Benzyl alcohol        | HfCl <sub>4</sub> /HfO <sub>2</sub>                                                                           | ---                             | 80 °C, 40 h                                                                                            | 99%/87%                   | 14   |
| 8     | 1,3-dicarbonyl compounds | Benzyl Alcohol        | Fe(OTf) <sub>3</sub> -N <sub>4111</sub> NTf <sub>2</sub>                                                      | -                               | 80 °C, 6 h                                                                                             | 99%/92-96%                | 15   |
| 9     | Benzene                  | Benzyl bromide        | Et <sub>3</sub> Si-(HCB <sub>11</sub> H <sub>5</sub> Br <sub>6</sub> )                                        | ---                             | r.t., 1 h                                                                                              | 99%/95%                   | 16   |
| 10    | benzene                  | dibenzyl ether        | AgClO <sub>4</sub> -SnCl <sub>4</sub>                                                                         | benzene                         | Room temperature, 3.5 h.                                                                               | /83%                      | 17   |
| 11    | p-xylene                 | benzyl methyl ether   | FeCl <sub>3</sub>                                                                                             | p-xylene                        | Arene (1 mL), benzyl methyl ether (0.5 mmol), FeCl <sub>3</sub> (10.0 mol% ), 90 °C, 12h.              | ---/90%                   | 18   |
| 12    | benzene                  | benzyl alcohol        | Sm(OTf) <sub>3</sub>                                                                                          | benzene                         | Benzylic reagent 1.0 mmol, benzene 5.0 mL, Sm(OTf) <sub>3</sub> 0.1 mmol, 115-120 °C, 6 h.             | ---/94%                   | 19   |
|       |                          | dibenzyl ether        |                                                                                                               |                                 |                                                                                                        | ---/39%                   | 19   |
| 13    | toluene                  | benzyl silyl ethers   | Hf(OTf) <sub>4</sub>                                                                                          | toluene                         | 10 mol% catalyst, 50 °C, 4.5 h.                                                                        | ---/80%                   | 20   |
| 14    | p-xylene                 | 1-phenylethyl acetate | H <sub>2</sub> [PtCl <sub>6</sub> ]-6H <sub>2</sub> O                                                         | p-xylene                        | 10 mL o-xylene, 0.5 mmol 1-phenylethyl acetate, 10 mol% catalyst, 80 °C, 20 h.                         | 100%/80%                  | 21   |
| 15    | p-xylene                 | dibenzyl ether        | [Ir <sub>2</sub> (COD) <sub>2</sub> (SnCl <sub>3</sub> ) <sub>2</sub> (Cl) <sub>2</sub> (μ-Cl) <sub>2</sub> ] | ---                             | Catalyst 1 mol%, dibenzyl ether 0.25 mmol, PX 8.0 mol, 90 °C, 60 min.                                  | ---/82%                   | 22   |
|       |                          |                       | [Ir(COD)Cl] <sub>2</sub> (1%)/SnCl <sub>4</sub> (4%)                                                          | ---                             | 90 °C, 1 h                                                                                             | 99%/82%                   | 22   |
| 16    | Anisole                  | Benzyl alcohol        | p2NPh-OSO <sub>3</sub> H                                                                                      | ---                             | 120 °C, 4 h                                                                                            | 99%/80%                   | 23   |
| 17    | p-xylene                 | Benzyl alcohol        | Hf <sub>0.5</sub> [TEAPS]PW <sub>12</sub> O <sub>40</sub>                                                     | ---                             | 140 °C, 2 h                                                                                            | 99%/99%                   | 24   |
| 18    | mesitylene               | benzyl alcohol        | Zeolite Beta                                                                                                  | mesitylene                      | Catalyst = 0.1 g; mesitylene = 14 mL; benzyl alcohol 0.2 mL; 100 °C, 30 min.                           | 92%/73%                   | 25   |

|    |                                       |                 |                                         |                                                                                   |                                                                                                                                             |                                 |           |
|----|---------------------------------------|-----------------|-----------------------------------------|-----------------------------------------------------------------------------------|---------------------------------------------------------------------------------------------------------------------------------------------|---------------------------------|-----------|
| 19 | p-xylene                              | benzyl alcohol  | Montmorillonite K-10                    | dioxane                                                                           | A mixture of arene (10 mmol), benzyl benzoate (10 mmol), and montmorillonite K-10 catalyst (500 mg) in dioxane (20 mL), refluxed for 3.0 h. | ---/76%                         | 26        |
| 20 | benzene                               | dibenzyl ether  | S-Zr/MCM-41                             | benzene                                                                           | The ratio dibenzyl ether and benzene (1:20), catalyst 10 wt%, 150 °C, 15 h.                                                                 | >99%/100%                       | 27        |
| 21 | p-xylene                              | Benzyl alcohol  | Polymer/12-tungstophosphoric acid       | p-xylene                                                                          | Benzyl alcohol (0.05 mol), treated with aromatic substrate (0.3 mol) with PANI supported TPA (0.16 g) at 80 °C for 4 h.                     | 98%/98%                         | 28        |
| 22 | Benzene                               | Benzyl chloride | FeO <sub>x</sub> /HZSM-5                | -                                                                                 | 80 °C, 4 h                                                                                                                                  | 92%/88%                         | 29        |
| 23 | Anisole                               | Benzyl alcohol  | P(VB-VMS)PW                             | -                                                                                 | 120 °C, 4 h                                                                                                                                 | 99%/96.7%                       | 30        |
| 24 | Benzene                               | Benzyl Chloride | SZF-12                                  | -                                                                                 | 80 °C, 4 h                                                                                                                                  | 87%/85%                         | 31        |
| 25 | Anisole                               | Benzyl Alcohol  | H <sub>2</sub> SO <sub>4</sub> /Meso Nb | -                                                                                 | 120 °C, 3 h                                                                                                                                 | 99%/92%                         | 32        |
| 26 | Anisole                               | Benzyl alcohol  | Sn <sub>1</sub> TPA                     | ---                                                                               | 120 °C, 0.5 h                                                                                                                               | 99%/98%                         | 33        |
| 27 | p-xylene                              | benzyl alcohol  | MoO <sub>x</sub>                        | p-xylene                                                                          | Benzyl alcohol 0.24 mL, arene 15.0 mL, catalyst 0.3 g, Ar, 135 °C, 10 min.                                                                  | 99%/99%                         | 34        |
|    |                                       |                 | Heterogeneous                           | Note: Acid-catalyzed benzyl cation-mediated Friedel–Crafts benzylation mechanism. |                                                                                                                                             |                                 |           |
| 28 | Dibenzoyl methane                     | Tolene          | Fe(OAc) <sub>2</sub>                    | -                                                                                 | 120 °C, 24 h                                                                                                                                | 85%/72%                         | 35        |
|    |                                       |                 |                                         | Note: Radical coupling mechanism.                                                 |                                                                                                                                             |                                 |           |
| 29 | N-methylquinoxalin-2(1 <i>H</i> )-one | Benzyl bromide  | Nucleophilic dithiocarbonate anions     | DCE                                                                               | 460 nm LED at 60 °C for 12 h.                                                                                                               | 99%/90%                         | 36        |
|    |                                       |                 |                                         | Note: Photocatalysis, Radical coupling mechanism.                                 |                                                                                                                                             |                                 |           |
| 30 | N-Heteroarenes                        | Benzaldehydes   | Rhodamine 6G                            | MeCN                                                                              | 390 nm LED at 50 °C for 48 h                                                                                                                | 89%/86%                         | 37        |
|    |                                       |                 |                                         | Note: Photocatalysis, Radical coupling mechanism.                                 |                                                                                                                                             |                                 |           |
| 31 | p-xylene                              | dibenzyl ether  | 2H-MoS <sub>2</sub>                     | p-xylene                                                                          | Catalyst 100 mg, dibenzyl ether 0.25 mmol, PX 2.0 mL, 140 °C, 10 min.                                                                       | 59.6%/57.1%                     | 38        |
|    |                                       |                 | Heterogeneous                           | Note: Radical-Friedel–Crafts benzylation mechanism.                               |                                                                                                                                             |                                 |           |
| 32 | p-xylene                              | dibenzyl ether  | MoO <sub>2</sub>                        | p-xylene                                                                          | Catalyst 100 mg, dibenzyl ether 0.25 mmol, PX 2.0 mL, 140 °C, 10 min.                                                                       | 78.9%/77.7%<br>99%/99% (60 min) | This work |
|    |                                       |                 | Heterogeneous                           | Note: Radical-Friedel–Crafts benzylation mechanism.                               |                                                                                                                                             |                                 |           |

## 21. NMR Spectra of some products

### 2-Benzyl-1,4-dimethylbenzene (3a)

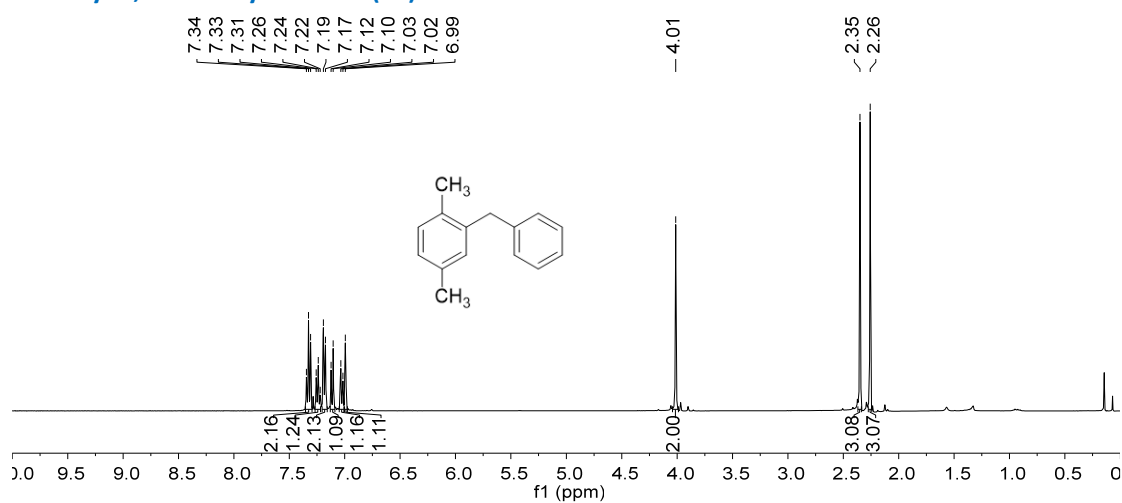

<sup>1</sup>H NMR (400 MHz, CDCl<sub>3</sub>)  $\delta$  7.33 (t,  $J$  = 7.2 Hz, 2H), 7.24 (t,  $J$  = 7.3 Hz, 1H), 7.18 (d,  $J$  = 7.3 Hz, 2H), 7.11 (d,  $J$  = 7.6 Hz, 1H), 7.03 (d,  $J$  = 7.7 Hz, 1H), 6.99 (s, 1H), 4.01 (s, 2H), 2.35 (s, 3H), 2.26 (s, 3H).

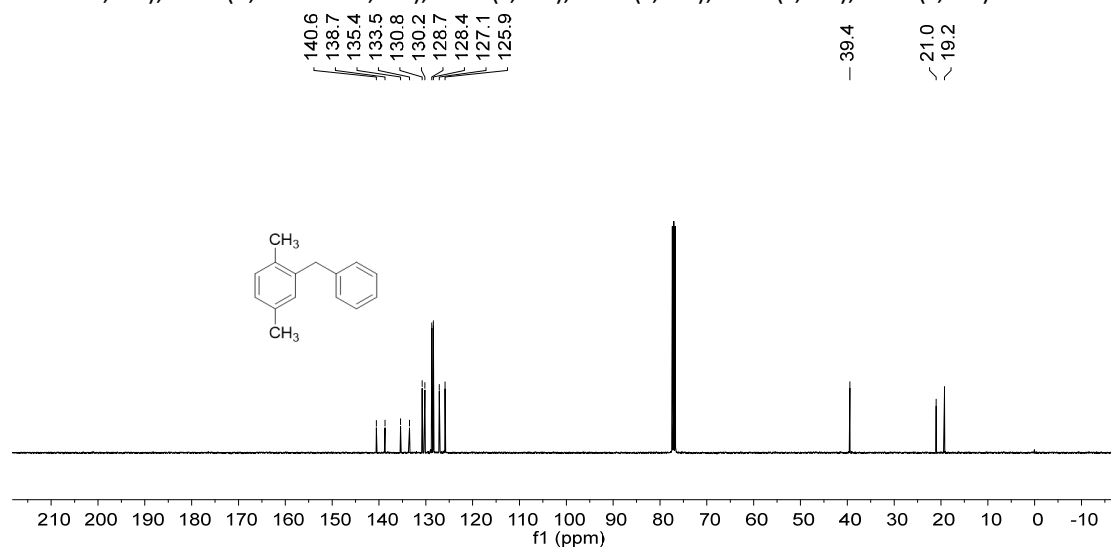

<sup>13</sup>C NMR (100 MHz, CDCl<sub>3</sub>)  $\delta$  140.6, 138.7, 135.4, 133.5, 130.8, 130.2, 128.7, 128.4, 127.1, 125.9, 39.4, 21.0, 19.2.

Diphenylmethane (Table 2, entry 1)

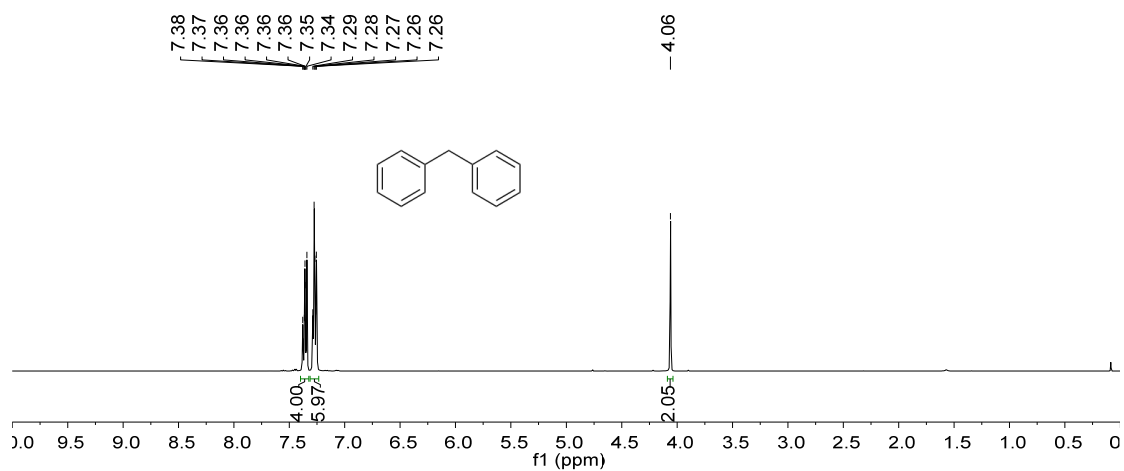

<sup>1</sup>H NMR (400 MHz, CDCl<sub>3</sub>) δ 7.40 – 7.32 (m, 4H), 7.31 – 7.23 (m, 6H), 4.06 (s, 2H).

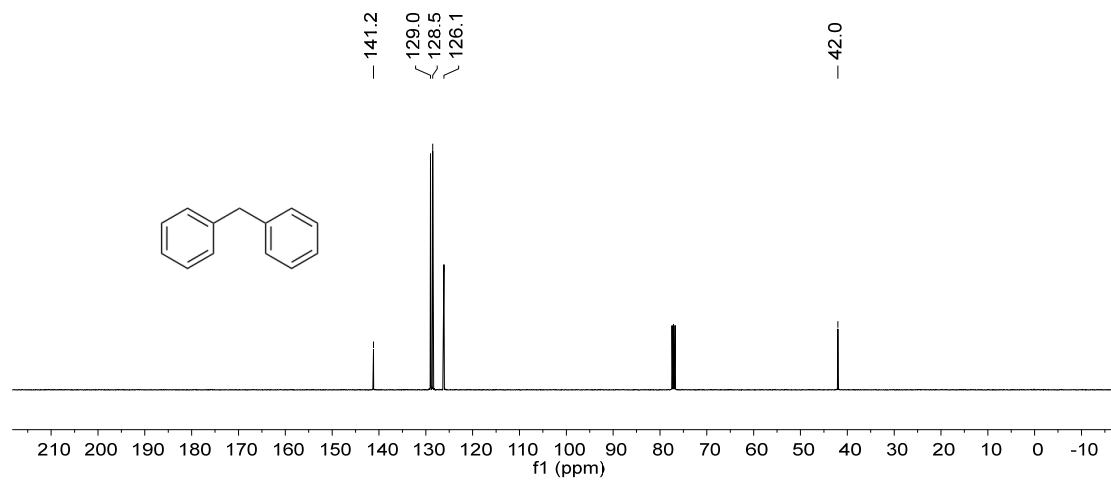

<sup>13</sup>C NMR (100 MHz, CDCl<sub>3</sub>) δ 141.2, 129.0, 128.5, 126.1, 42.0.

4-Methyldiphenylmethane (Table 2, entry 2)

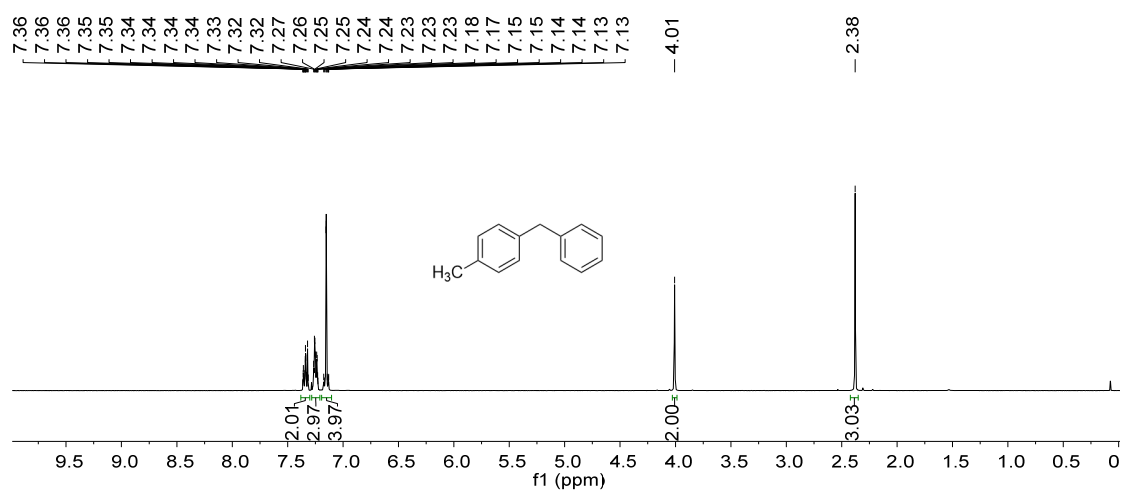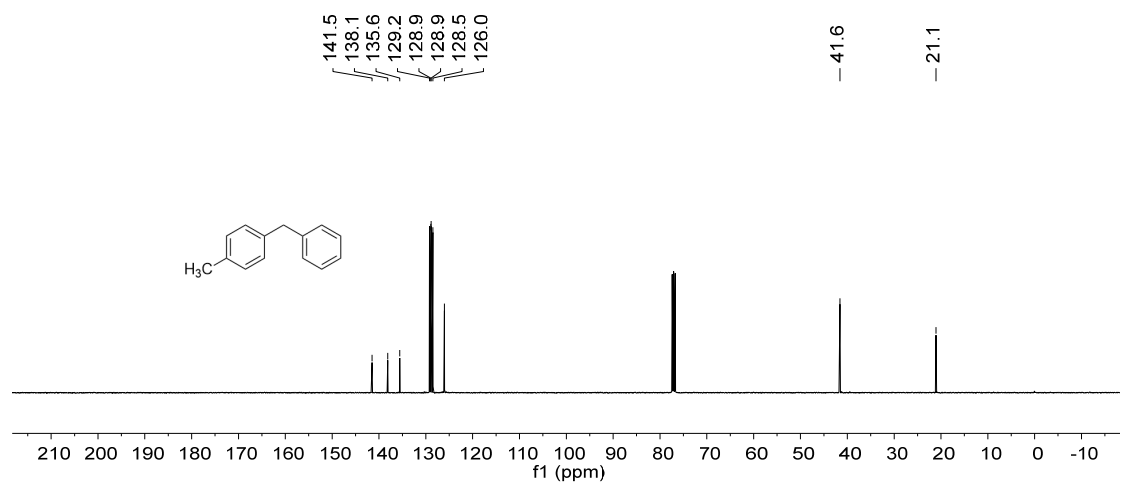

4-Methoxydiphenylmethane (Table 2, entry 5)

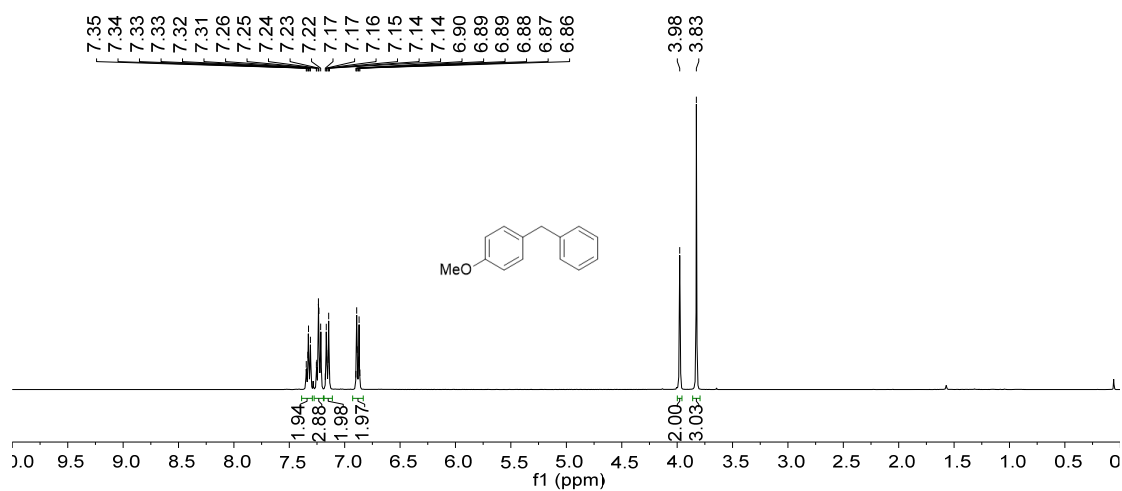

<sup>1</sup>H NMR (400 MHz, CDCl<sub>3</sub>) δ 7.39 – 7.29 (m, 2H), 7.28 – 7.19 (m, 3H), 7.19 – 7.11 (m, 2H), 6.93 – 6.83 (m, 2H), 3.98 (s, 2H), 3.83 (s, 3H).

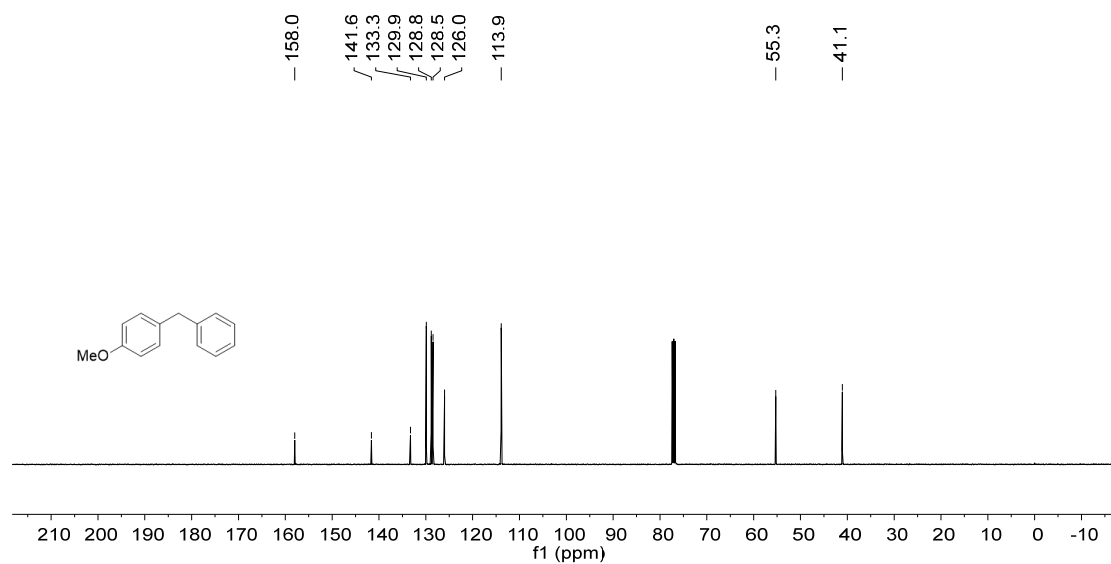

<sup>13</sup>C NMR (100 MHz, CDCl<sub>3</sub>) δ 158.0, 141.6, 133.3, 129.9, 128.8, 128.5, 126.0, 113.9, 55.3, 41.1.

2-Benzyl-naphthalene (Table 2, entry 7)

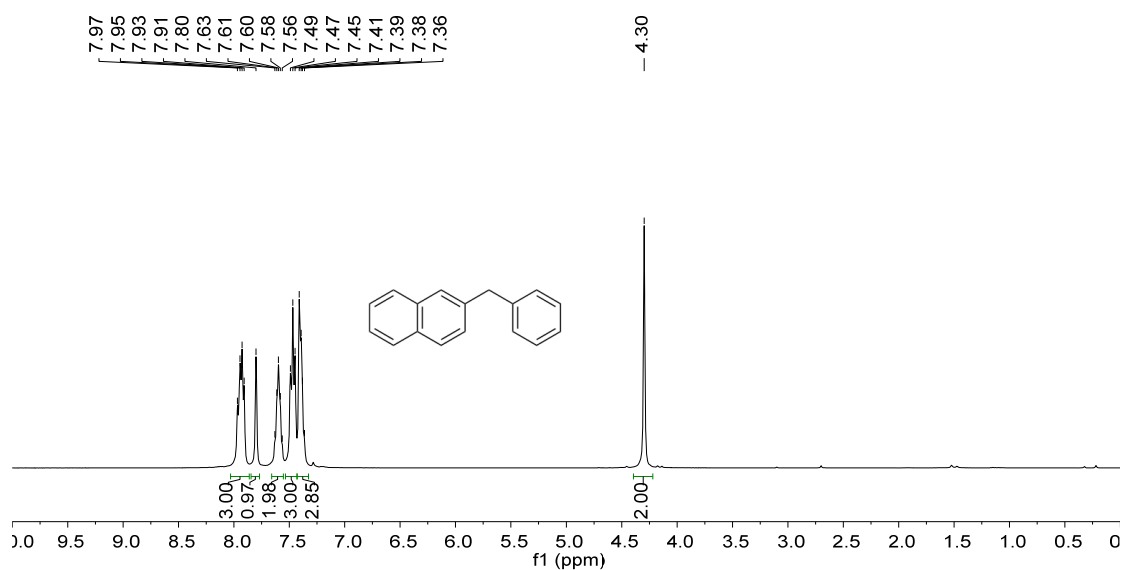

<sup>1</sup>H NMR (400 MHz, CDCl<sub>3</sub>) δ 8.03 – 7.86 (m, 3H), 7.80 (s, 1H), 7.66 – 7.55 (m, 2H), 7.53 – 7.43 (m, 3H), 7.43 – 7.32 (m, 3H), 4.30 (s, 2H).

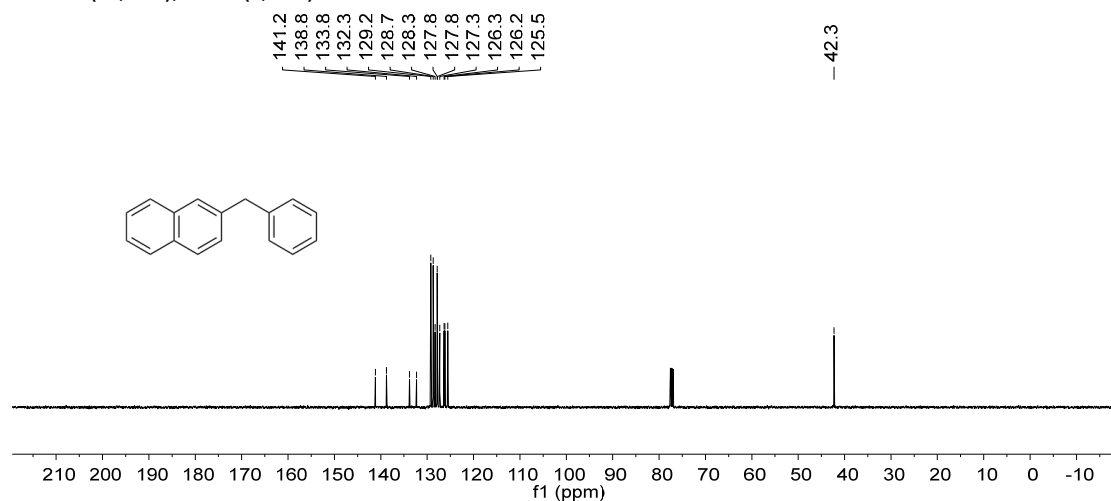

<sup>13</sup>C NMR (100 MHz, CDCl<sub>3</sub>) δ 141.2, 138.8, 133.8, 132.3, 129.2, 128.7, 128.3, 127.83, 127.76, 127.3, 126.3, 126.2, 125.5, 42.3.

1-(2-benzylphenyl)ethan-1-one (Table 2, entry 8)

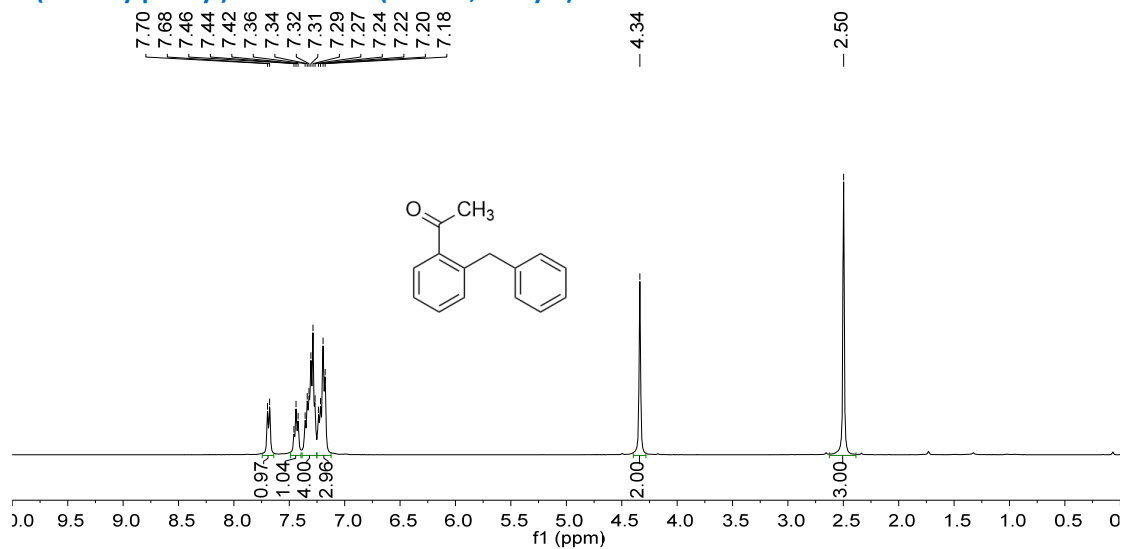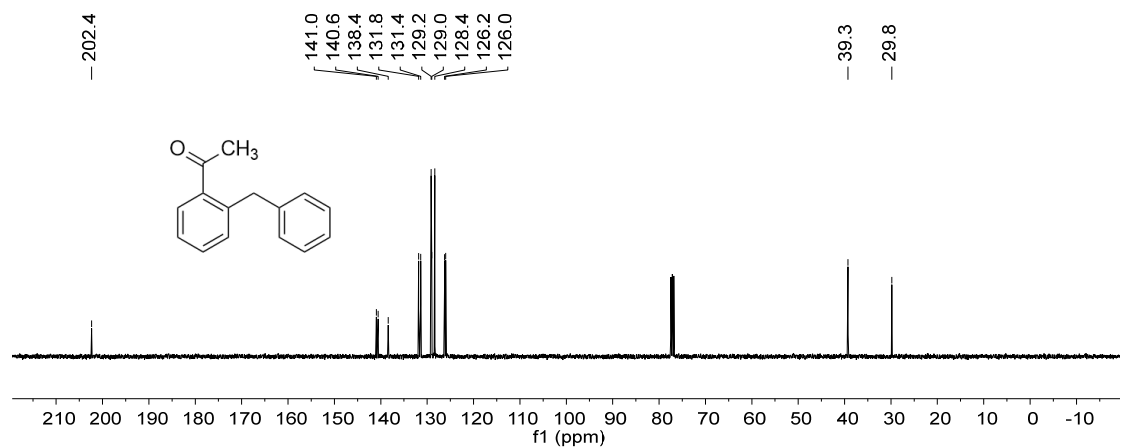

**4-Chlorodiphenylmethane (Table 2, entry 9)**

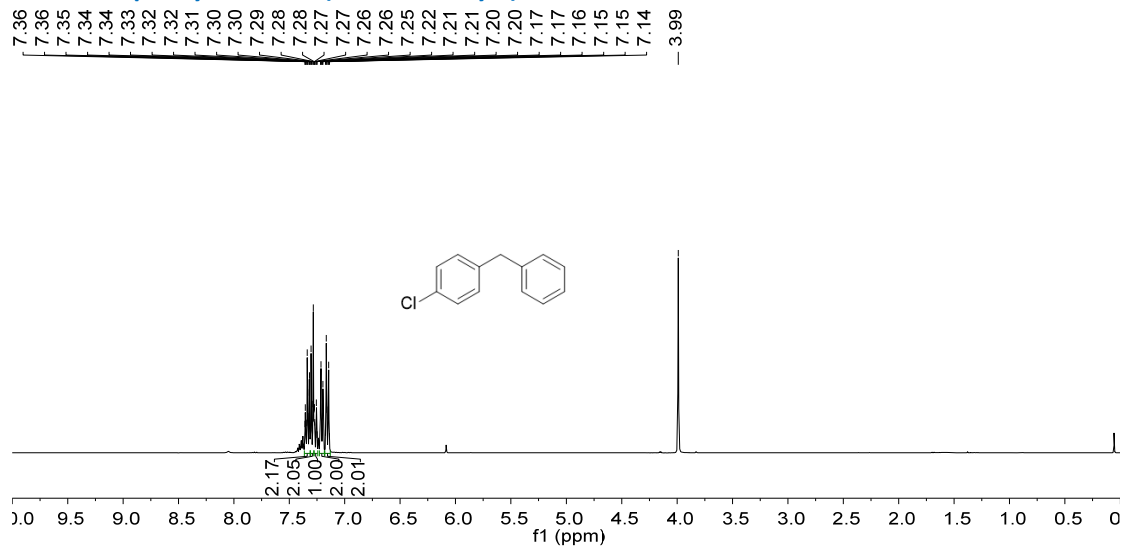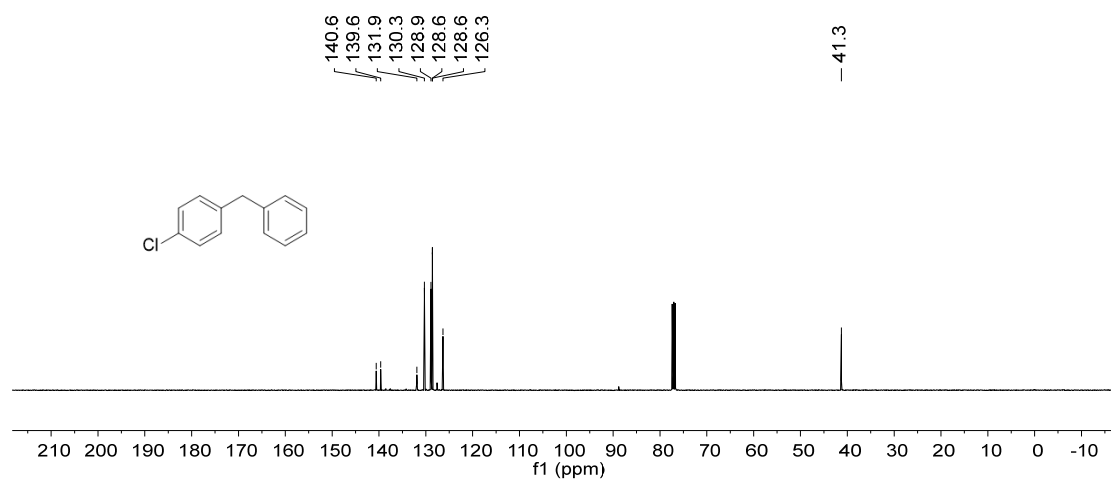

1-Benzyl-4-bromobenzene (Table 2, entry 10)

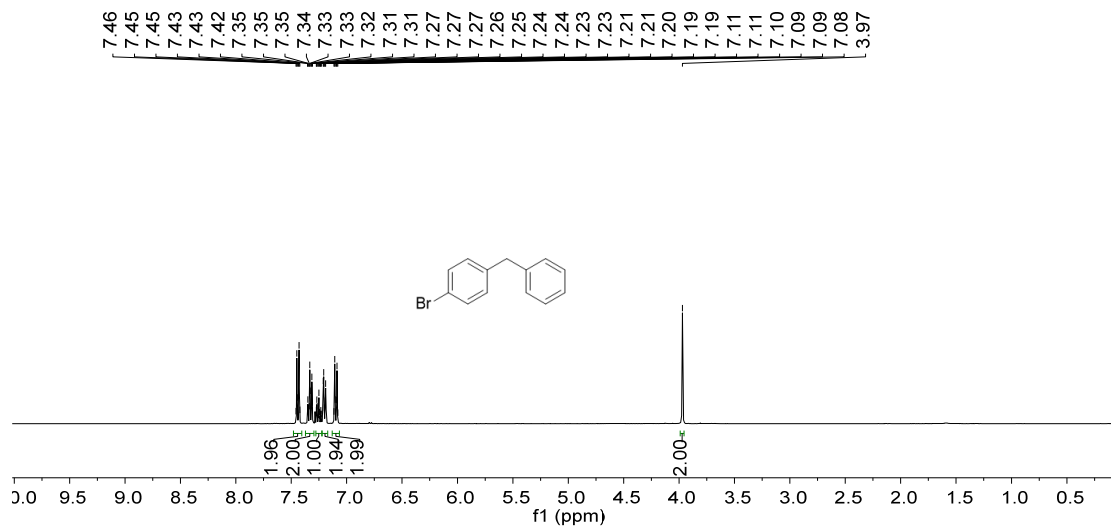

<sup>1</sup>H NMR (400 MHz, CDCl<sub>3</sub>) δ 7.48 – 7.41 (m, 2H), 7.37 – 7.29 (m, 2H), 7.28 – 7.22 (m, 1H), 7.22 – 7.17 (m, 2H), 7.13 – 7.06 (m, 2H), 3.97 (s, 2H).

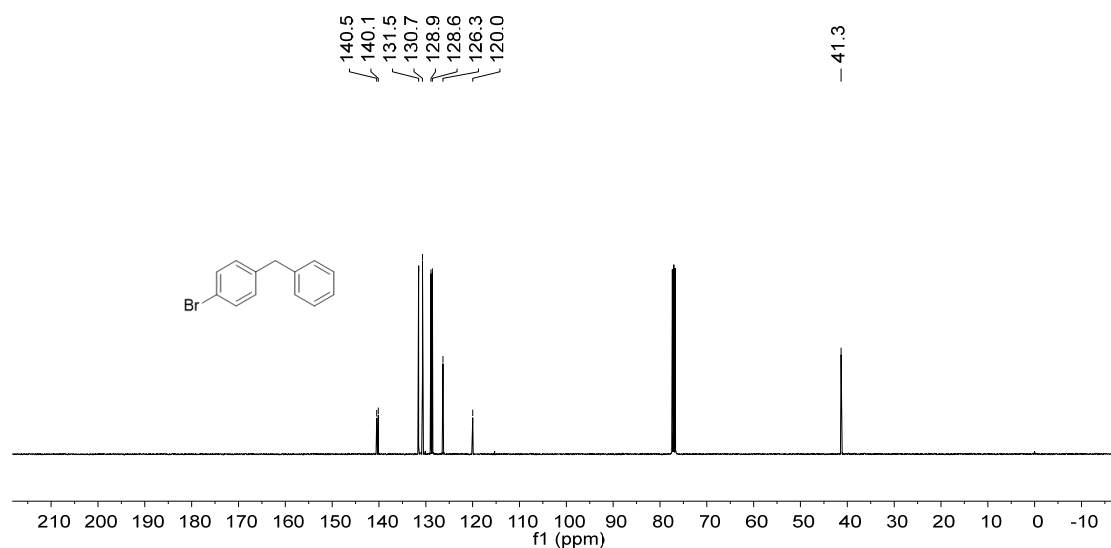

<sup>13</sup>C NMR (100 MHz, CDCl<sub>3</sub>) δ 140.5, 140.1, 131.5, 130.7, 128.9, 128.6, 126.3, 120.0, 41.3.

3-benzylpyridine (Table 2, entry 11)

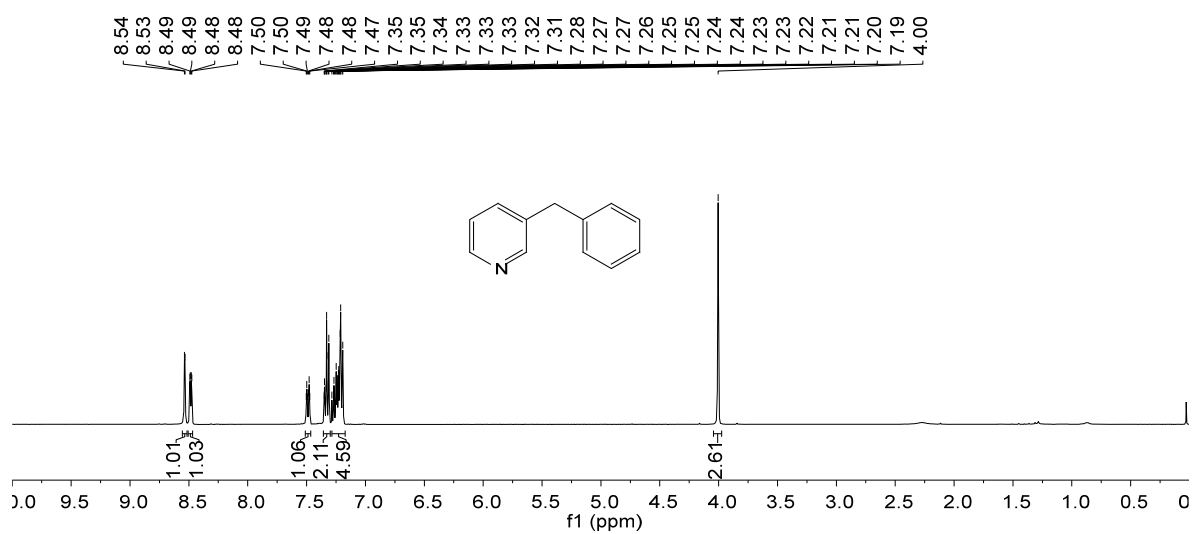

$^1\text{H}$  NMR (400 MHz,  $\text{CDCl}_3$ )  $\delta$  8.53 (d,  $J$  = 2.3 Hz, 1H), 8.49 (dd,  $J$  = 4.8, 1.7 Hz, 1H), 7.49 (dt,  $J$  = 7.9, 2.1 Hz, 1H), 7.36 – 7.30 (m, 2H), 7.28 – 7.17 (m, 4H), 4.00 (s, 2H).

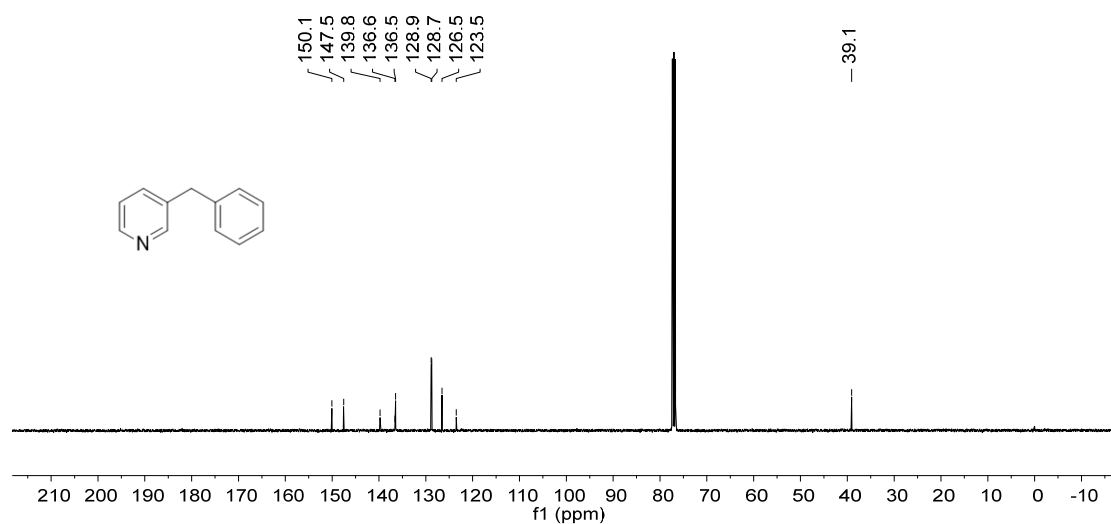

$^{13}\text{C}$  NMR (100 MHz,  $\text{CDCl}_3$ )  $\delta$  150.1, 147.5, 139.8, 136.6, 136.5, 128.9, 128.7, 126.5, 123.5, 39.1.

5-benzylquinoline (Table 2, entry 12)

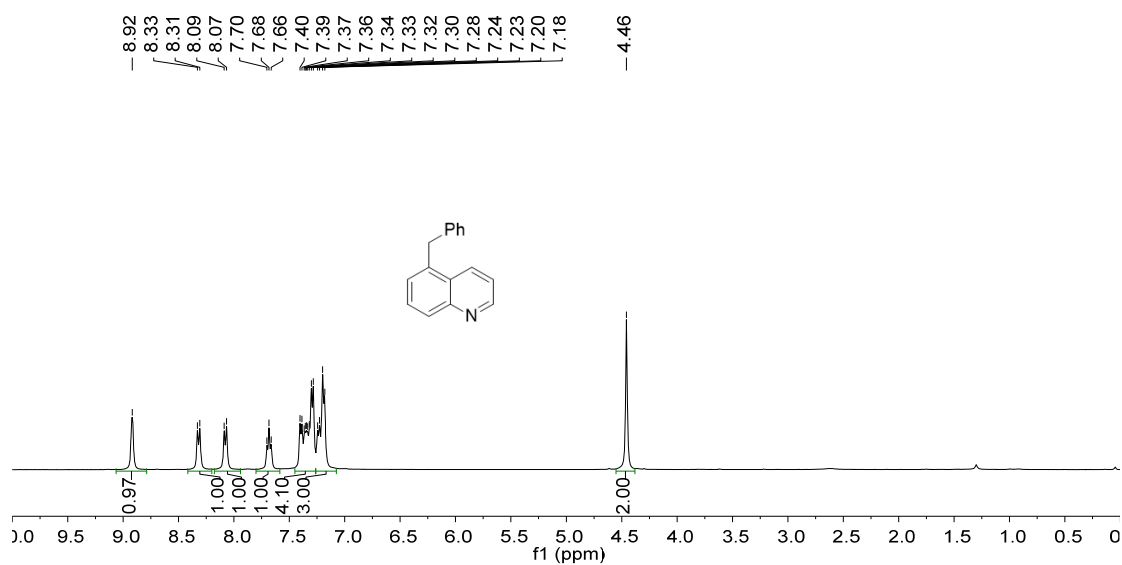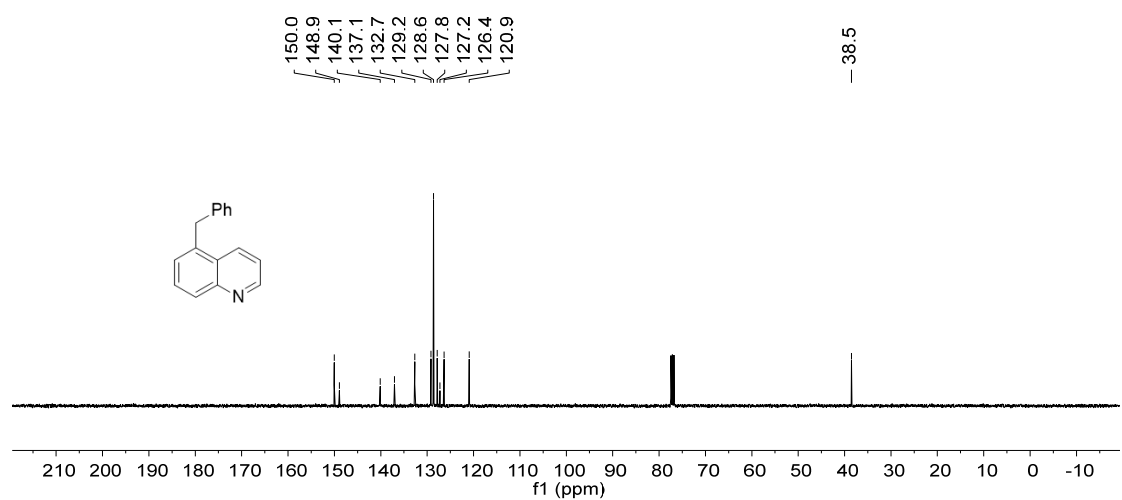

2-(4-chlorobenzyl)-1,4-dimethylbenzene (Table 2, entry 14)

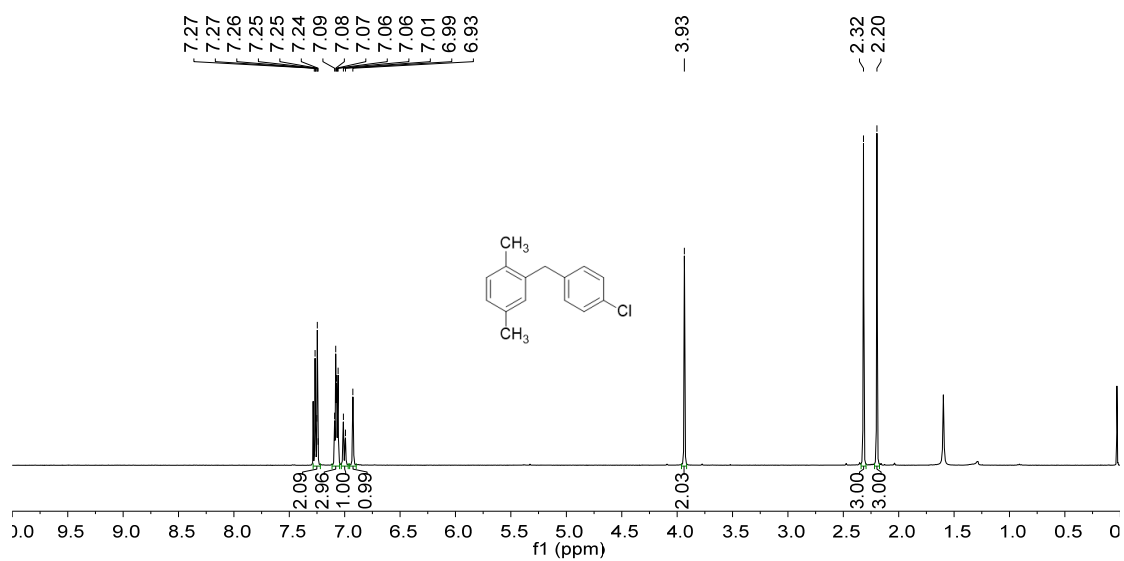

<sup>1</sup>H NMR (400 MHz, CDCl<sub>3</sub>) δ 7.28 – 7.22 (m, 2H), 7.11 – 7.05 (m, 3H), 7.00 (d, *J* = 7.7 Hz), 6.93 (s, 1H), 3.93 (s, 2H), 2.32 (s, 3H), 2.20 (s, 3H).

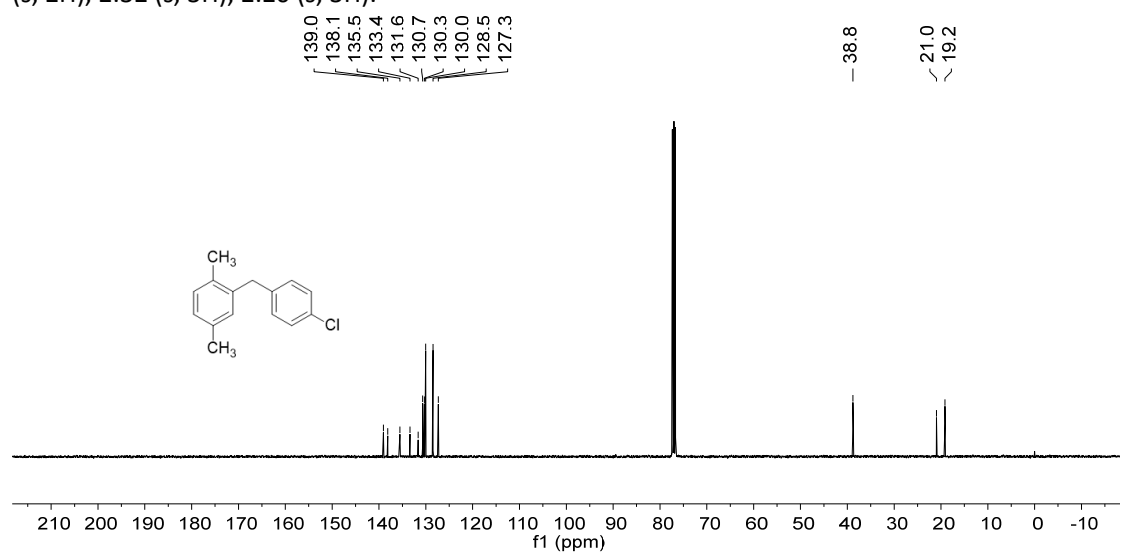

<sup>13</sup>C NMR (100 MHz, CDCl<sub>3</sub>) δ 139.0, 138.1, 135.5, 133.4, 131.6, 130.7, 130.3, 130.0, 128.5, 127.3, 38.8, 21.0, 19.2.

2-(4-bromobenzyl)-1,4-dimethylbenzene (Table 2, entry15)

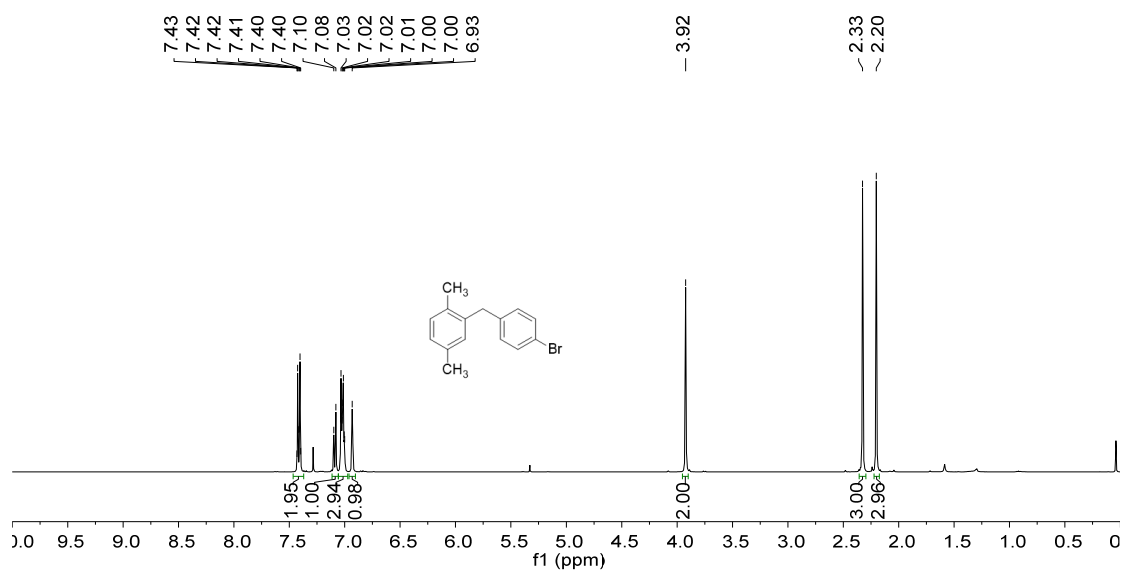

<sup>1</sup>H NMR (400 MHz, CDCl<sub>3</sub>) δ 7.46 – 7.37 (m, 2H), 7.09 (d, *J* = 7.6 Hz, 1H), 7.06 – 6.97 (m, 3H), 6.93 (s, 1H), 3.92 (s, 2H), 2.33 (s, 3H), 2.20 (s, 3H).

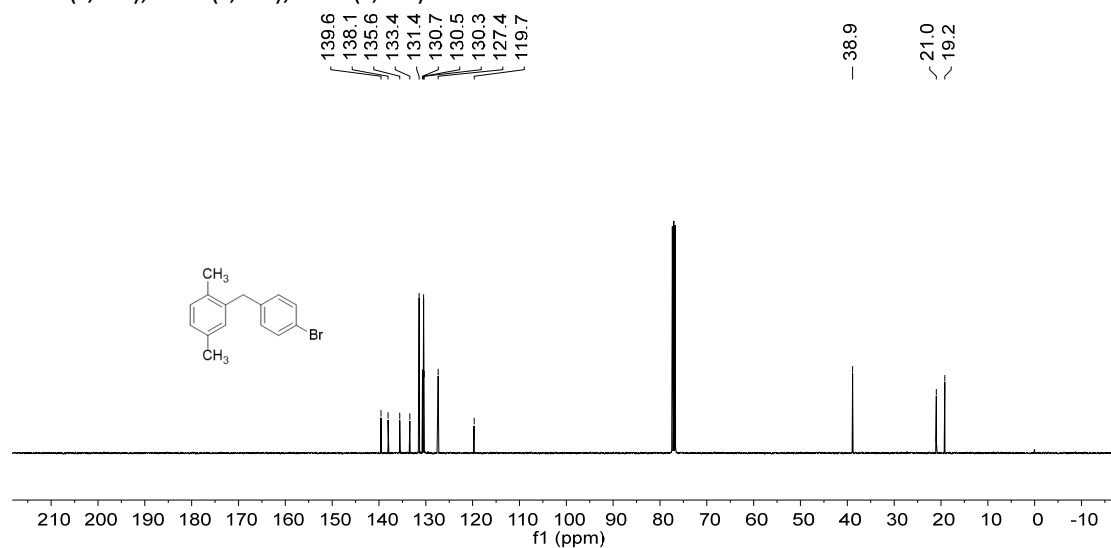

<sup>13</sup>C NMR (100 MHz, CDCl<sub>3</sub>) δ 139.6, 138.1, 135.6, 133.4, 131.4, 130.7, 130.5, 130.3, 127.4, 119.7, 38.9, 21.0, 19.2.

1,4-dimethyl-2-(4-methylbenzyl)benzene (Table 2, entry16)

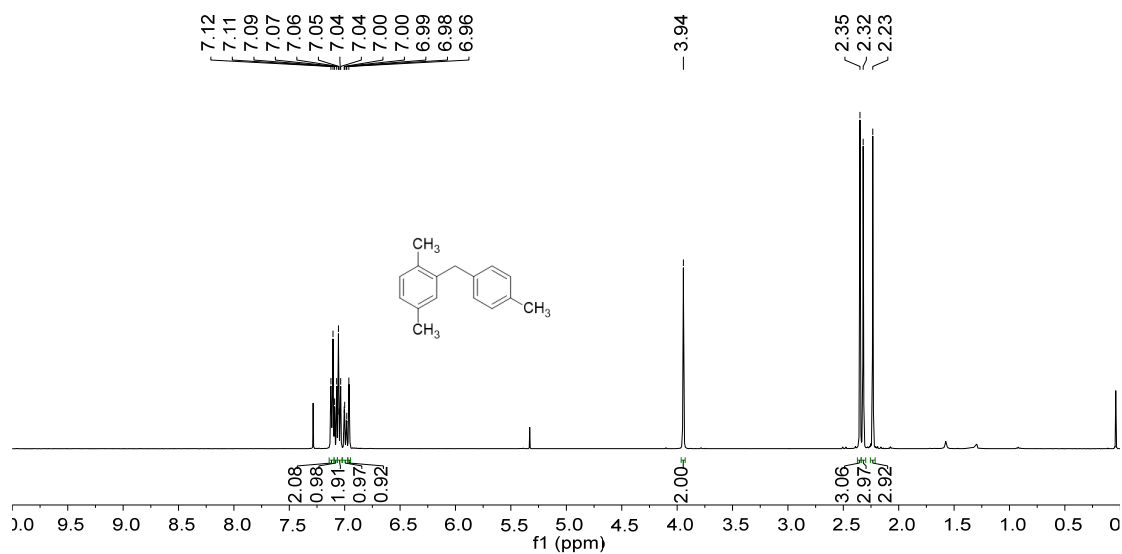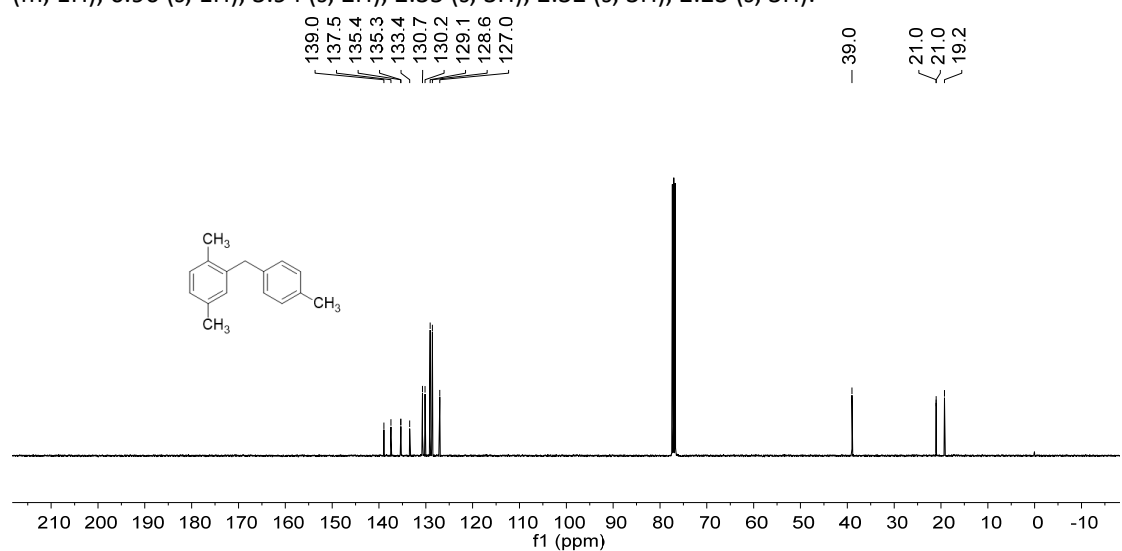

2-(4-methoxybenzyl)-1,4-dimethylbenzene (Table 2, entry17)

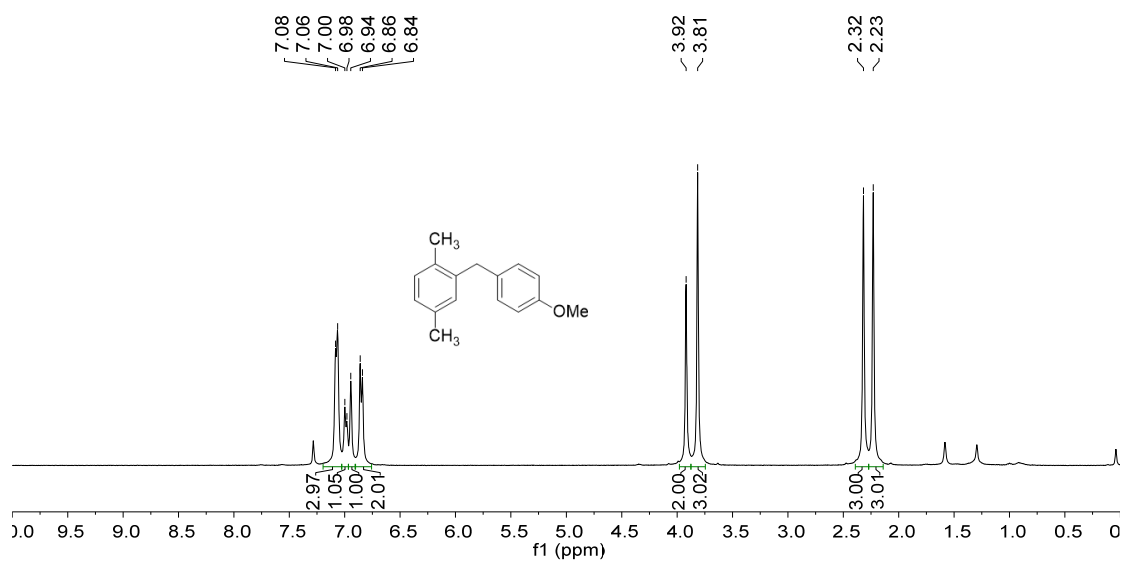

<sup>1</sup>H NMR (400 MHz, CDCl<sub>3</sub>) δ 7.20 – 7.03 (m, 3H), 6.99 (d, *J* = 7.8 Hz, 1H), 6.94 (s, 1H), 6.85 (d, *J* = 8.2 Hz, 2H), 3.92 (s, 2H), 3.81 (s, 3H), 2.31 (s, 3H), 2.23 (s, 3H).

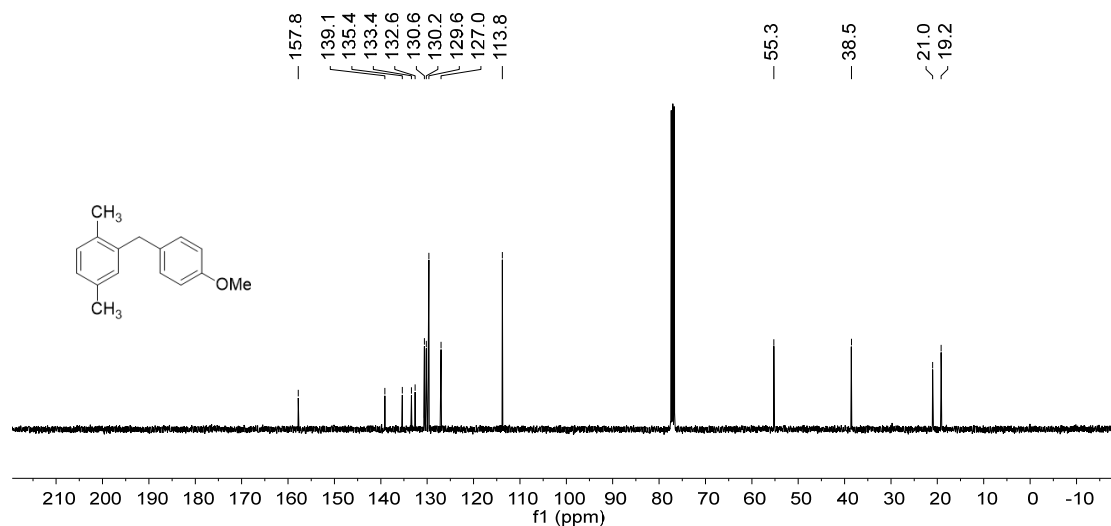

<sup>13</sup>C NMR (100 MHz, CDCl<sub>3</sub>) δ 157.8, 139.1, 135.4, 133.4, 132.6, 130.6, 130.2, 129.6, 127.0, 113.8, 55.3, 38.5, 21.0, 19.2.

## 22. Mass spectra data of the products

Diphenylmethane (Table 2, entry 1)

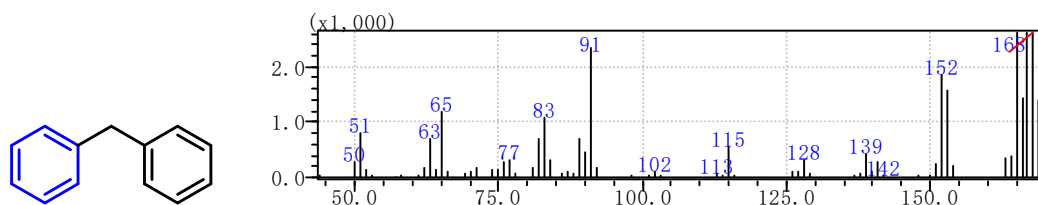

1,4-Dimethyl-2-(2-methylbenzyl)benzene (Table 2, entry 2)

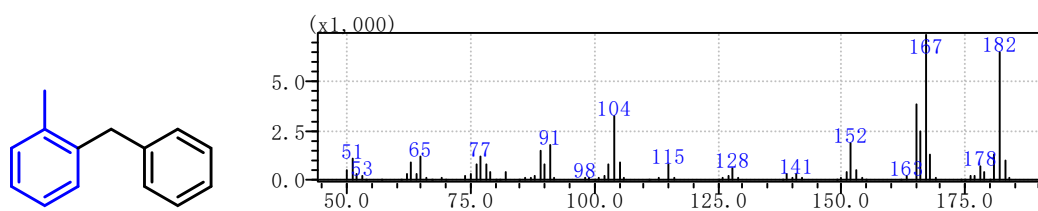

1-benzyl-2-ethylbenzene (Table 2, entry 3)

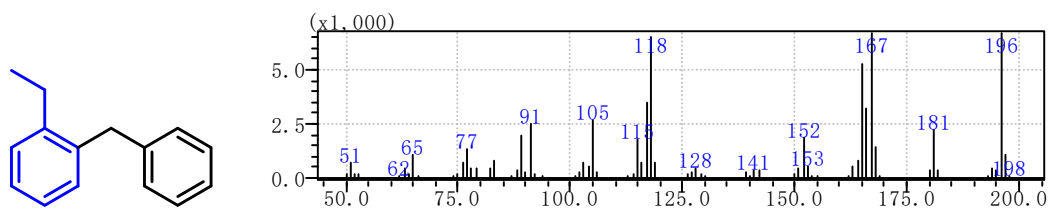

2-Benzyl-1,3,5-trimethylbenzene (Table 2, entry 4)

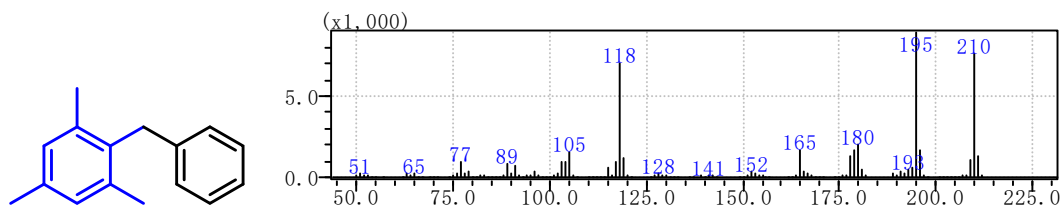

1-benzyl-2-methoxybenzene (Table 2, entry 5)

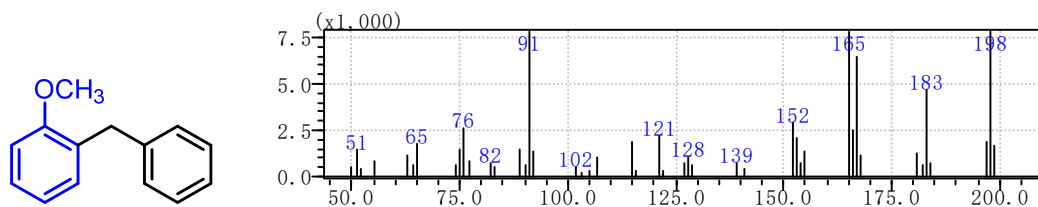

1-benzyl-2-isopropylbenzene (Table 2, entry 6)

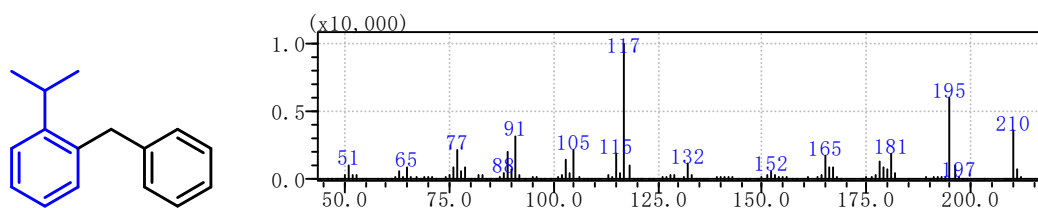

2-(2,5-Dimethylbenzyl)naphthalene (Table 2, entry 7)

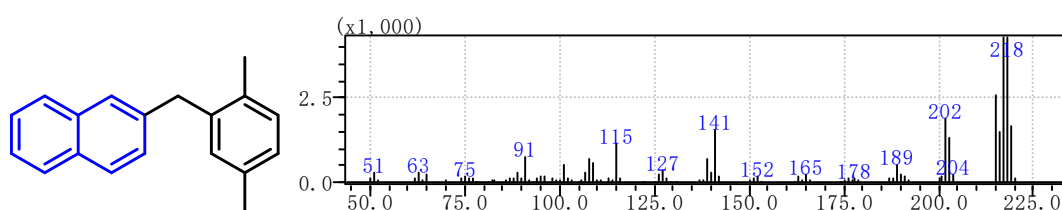

Methyl 4-(2,5-dimethylbenzyl)benzoate (Table 2, entry 8)

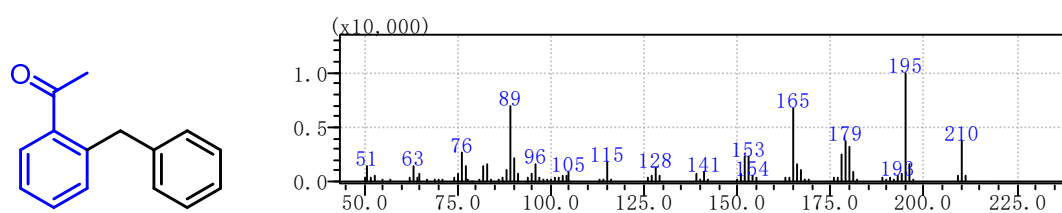

2-(1-chlorobenzyl)-1,4-dimethylbenzene (Table 2, entry 9)

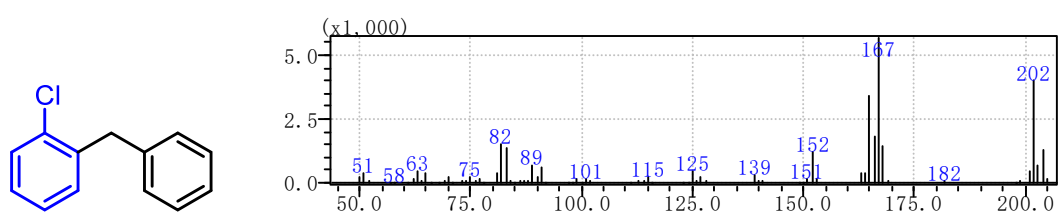

2-(1-Bromobenzyl)-1,4-dimethylbenzene (Table 2, entry 10)

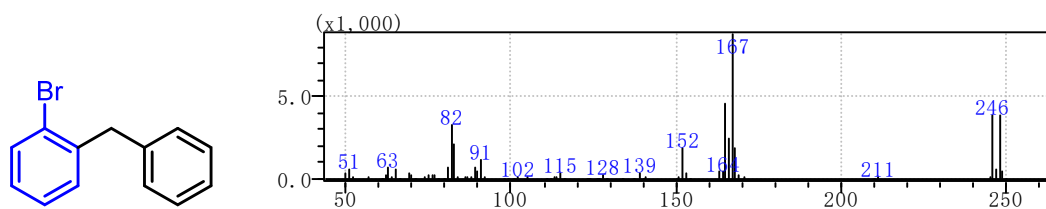

3-benzylpyridine (Table 2, entry 11)

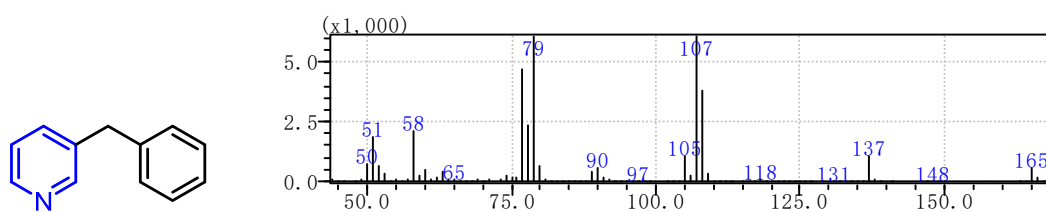

3-benzylquinoline (Table 2, entry 12)

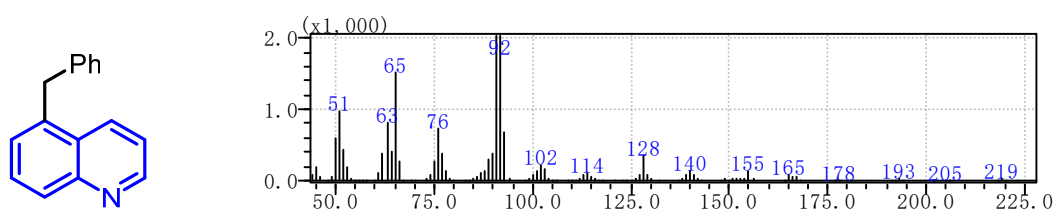

3-benzyl-1H-pyrrole (Scheme S4)

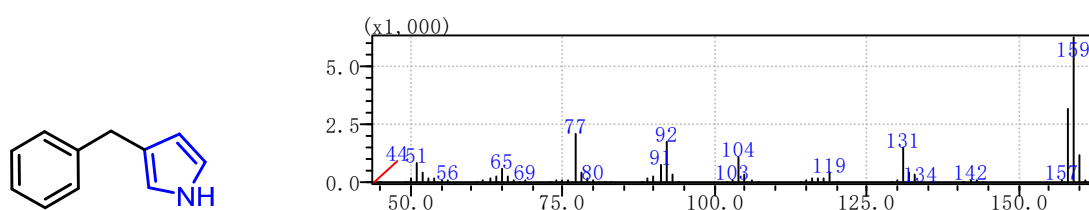

5-benzyl-1H-indole (Scheme S4)

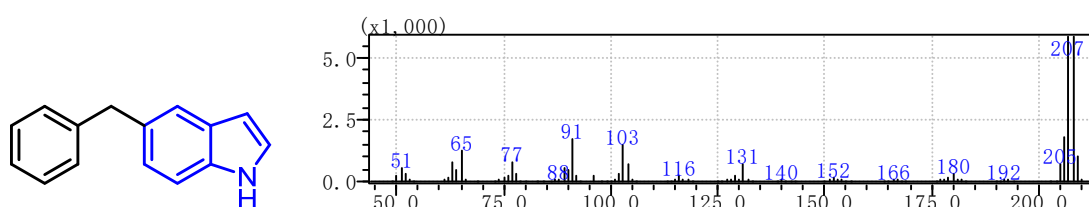

6-benzyl-2H-chromen-2-one (Table 2, entry 13)

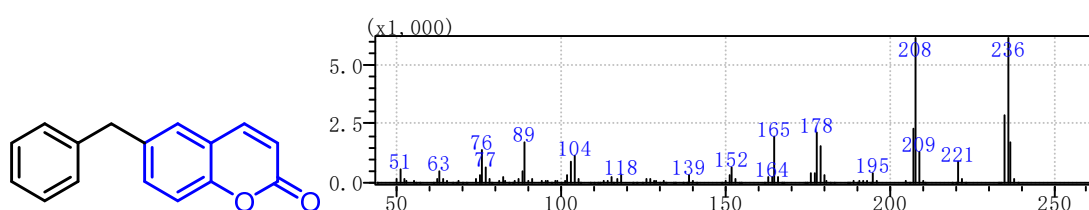

2-(4-chlorobenzyl)-1,4-dimethylbenzene (Table 2, entry 14)

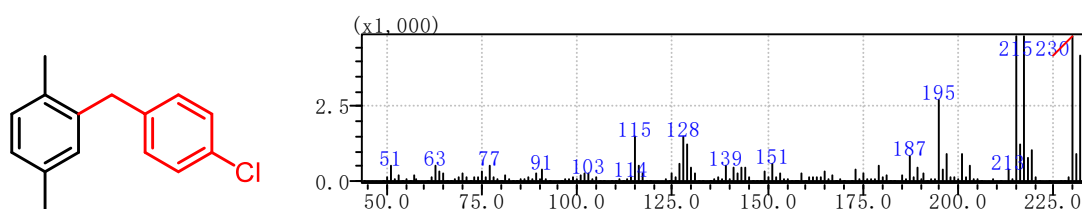

2-(4-bromobenzyl)-1,4-dimethylbenzene (Table 2, entry 15)

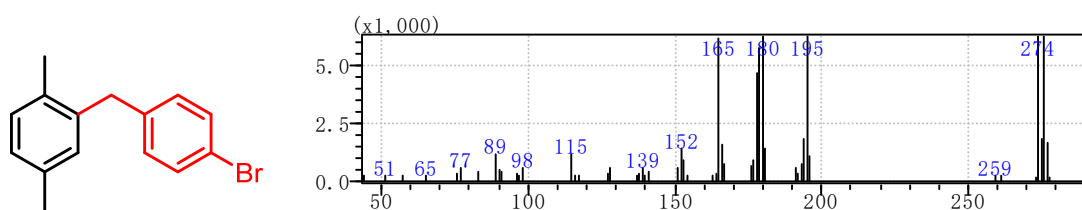

1,4-dimethyl-2-(4-methylbenzyl)benzene (Table 2, entry 16)

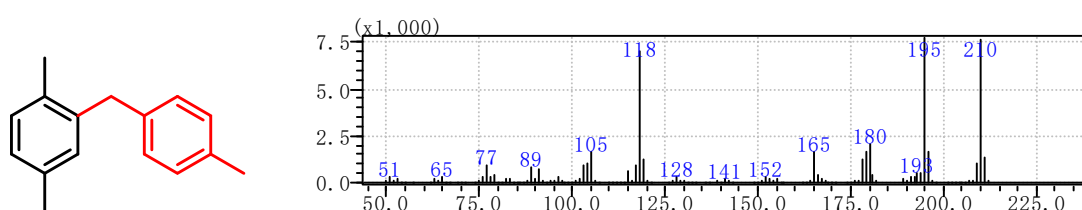

2-(4-methoxybenzyl)-1,4-dimethylbenzene (Table 2, entry 17)

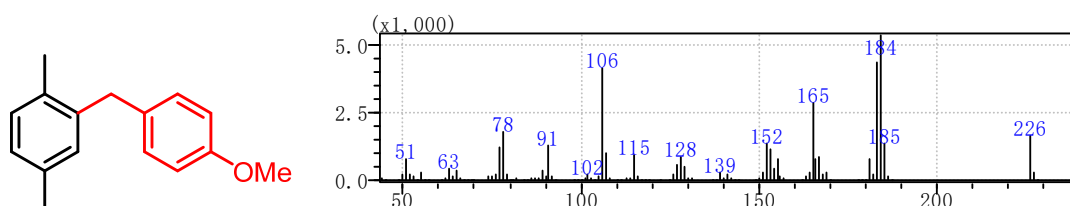

## References

1. G. Kresse and J. Furthmüller, *Comp. Mater. Sci.*, 1996, **6**, 15-50.
2. G. Kresse and J. Furthmüller, *Phys. Rev. B*, 1996, **54**, 11169-11186.
3. J. P. Perdew, K. Burke and M. Ernzerhof, *Physical Review Letters*, 1996, **77**, 3865-3868.
4. G. Kresse and D. Joubert, *Phys. Rev. B*, 1999, **59**, 1758-1775.
5. P. E. Blöchl, *Physical Review B*, 1994, **50**, 17953-17979.
6. S. L. Dudarev, G. A. Botton, S. Y. Savrasov, C. J. Humphreys and A. P. Sutton, *Phys. Rev. B*, 1998, **57**, 1505-1509.
7. S. Grimme, J. Antony, S. Ehrlich and H. Krieg, *The Journal of chemical physics*, 2010, **132**, 154104.
8. B. Yuan, W. Zhao, F. Yu and C. Xie, *Catal. Commun.*, 2014, **57**, 89-93.
9. F. Wu, Y. Zhao, Y. Wang, Y. Xu, M. Tang, Z. Wang, B. Han and Z. Liu, *Green Chem.*, 2022, **24**, 3137-3142.
10. S. Zhang, X. Zhang, X. Ling, C. He, R. Huang, J. Pan, J. Li and Y. Xiong, *RSC Adv.*, 2014, **4**, 30768-30774.
11. P. A. Champagne, Y. Benhassine, J. Desroches and J.-F. Paquin, *Angew. Chem. Int. Ed.*, 2014, **53**, 13835-13839.
12. M. Kaneko, R. Hayashi and G. R. Cook, *Tetrahedron Lett.*, 2007, **48**, 7085-7087.
13. M. Ramos-Martín, J. García-Álvarez and A. P. Soto, *ChemSusChem*, 2025, **18**, e202400892.
14. C. Y. Zhang, X. Q. Gao, J. H. Zhang and X. J. Peng, *Chin. Chem. Lett.*, 2009, **20**, 913-916.
15. P. Moriel and A. B. García, *Green Chem.*, 2014, **16**, 4306-4311.
16. T. He, H. F. T. Klare and M. Oestreich, *ACS Catal.*, 2021, **11**, 12186-12193.
17. T. Mukaiyama, M. Ueki, T. Izawa and M. Kuwahara, *Chem Lett*, 2006, **1**, 443-444.
18. B.-Q. Wang, S.-K. Xiang, Z.-P. Sun, B.-T. Guan, P. Hu, K.-Q. Zhao and Z.-J. Shi, *Tetrahedron Lett.*, 2008, **49**, 4310-4312.
19. T. Tsuchimoto, K. Tobita, T. Hiyama and S.-i. Fukuzawa, *J. Org. Chem.*, 1997, **62**, 6997-7005.
20. I. Shiina and M. Suzuki, *Tetrahedron Lett.*, 2002, **43**, 6391-6394.
21. K. Mertins, I. Iovel, J. Kischel, A. Zapf and M. Beller, *Angew. Chem. Int. Ed.*, 2005, **44**, 238-242.
22. S. Podder and S. Roy, *Tetrahedron*, 2007, **63**, 9146-9152.
23. R. M. N. Kalla, R. Chakali, M. Amudala, M. Varalakshmi and C. Nagaraju, *Organic Communications*, 2021, DOI: 10.25135/acg.oc.106.2104.2034, 300-304.
24. B. Yuan, Y. Li, Z. Wang, F. Yu, C. Xie and S. Yu, *Molecular Catalysis*, 2017, **443**, 110-116.
25. Y. Wang, Y. Y. Sun, C. Lancelot, C. Lamonier, J. C. Morin, B. Revel, L. Delevoye and A. Rives, *Microporous and Mesoporous Materials*, 2015, **206**, 42-51.
26. N. N. Karade, S. G. Shirodkar and R. A. Potrekar, *J Chem Res*, 2003, 652-654.

27. M. H. Al-Hazmi and A. W. Apblett, *Catal. Sci. Technol.*, 2011, **1**, 621-630.
28. J. R. Satam and R. V. Jayaram, *Catal. Commun.*, 2008, **9**, 1937-1940.
29. T. Lin, X. Zhang, R. Li, T. Bai and S. Y. Yang, *Chin. Chem. Lett.*, 2011, **22**, 639-642.
30. J. Li, Y. Zhou, D. Mao, G. Chen, X. Wang, X. Yang, M. Wang, L. Peng and J. Wang, *Chem. Eng. J.*, 2014, **254**, 54-62.
31. C. Khatri, M. K. Mishra and A. Rani, *Fuel Processing Technology*, 2010, **91**, 1288-1295.
32. Y. Rao, M. Trudeau and D. Antonelli, *J. Am. Chem. Soc.*, 2006, **128**, 13996-13997.
33. C. Ramesh Kumar, K. T. V. Rao, P. S. Sai Prasad and N. Lingaiah, *J. Mol. Catal. A: Chem.*, 2011, **337**, 17-24.
34. F. Wang and W. Ueda, *Chem. Eur. J.*, 2009, **15**, 742-753.
35. S. Pan, J. Liu, Y. Li and Z. Li, *Chin. Sci. Bull.*, 2012, **57**, 2382-2386.
36. P. Xiang, K. Sun, S. Wang, X. Chen, L. Qu and B. Yu, *Chin. Chem. Lett.*, 2022, **33**, 5074-5079.
37. J.-C. Hou, J. Jiang, H. Dai, J.-S. Wang, T. Li, X. Chen and W.-M. He, *Science China Chemistry*, 2025, **68**, 1945-1951.
38. X. Du, C. Zhang and S. Liu, *Dalton Trans.*, 2022, **51**, 15322–15329.
